# Supplementary material for: Diversity patterns of the South African azooxanthellate scleractinians (Cnidaria: Anthozoa), with considerations of environmental correlates
Source: PubMed Central journal article supplement (PMC11309500; doi:10.1371/journal.pone.0296188), 2024-08-08

# PLOS ONE

## The application of historic sample-specific variables in evaluating the biodiversity patterns of the South African azooxanthellate scleractinians (Cnidaria: Anthozoa). --Manuscript Draft--

|                                                                                                                                                                                                                                                                                                                   |                                                                                                                                                                                                                                                                                                                                                                                                                                                                                                                                                                                                                                                                                                                                                                                                                                                                                                                                                                                                                                                                                                                                                                                                                                                                                                                                                                                                                                                                                                                                                                                                                                                                                                                                                                                                                                                                                           |
|-------------------------------------------------------------------------------------------------------------------------------------------------------------------------------------------------------------------------------------------------------------------------------------------------------------------|-------------------------------------------------------------------------------------------------------------------------------------------------------------------------------------------------------------------------------------------------------------------------------------------------------------------------------------------------------------------------------------------------------------------------------------------------------------------------------------------------------------------------------------------------------------------------------------------------------------------------------------------------------------------------------------------------------------------------------------------------------------------------------------------------------------------------------------------------------------------------------------------------------------------------------------------------------------------------------------------------------------------------------------------------------------------------------------------------------------------------------------------------------------------------------------------------------------------------------------------------------------------------------------------------------------------------------------------------------------------------------------------------------------------------------------------------------------------------------------------------------------------------------------------------------------------------------------------------------------------------------------------------------------------------------------------------------------------------------------------------------------------------------------------------------------------------------------------------------------------------------------------|
| <b>Manuscript Number:</b>                                                                                                                                                                                                                                                                                         | PONE-D-23-17495                                                                                                                                                                                                                                                                                                                                                                                                                                                                                                                                                                                                                                                                                                                                                                                                                                                                                                                                                                                                                                                                                                                                                                                                                                                                                                                                                                                                                                                                                                                                                                                                                                                                                                                                                                                                                                                                           |
| <b>Article Type:</b>                                                                                                                                                                                                                                                                                              | Research Article                                                                                                                                                                                                                                                                                                                                                                                                                                                                                                                                                                                                                                                                                                                                                                                                                                                                                                                                                                                                                                                                                                                                                                                                                                                                                                                                                                                                                                                                                                                                                                                                                                                                                                                                                                                                                                                                          |
| <b>Full Title:</b>                                                                                                                                                                                                                                                                                                | The application of historic sample-specific variables in evaluating the biodiversity patterns of the South African azooxanthellate scleractinians (Cnidaria: Anthozoa).                                                                                                                                                                                                                                                                                                                                                                                                                                                                                                                                                                                                                                                                                                                                                                                                                                                                                                                                                                                                                                                                                                                                                                                                                                                                                                                                                                                                                                                                                                                                                                                                                                                                                                                   |
| <b>Short Title:</b>                                                                                                                                                                                                                                                                                               | Evaluating biodiversity patterns of South African azooxanthellate scleractinians.                                                                                                                                                                                                                                                                                                                                                                                                                                                                                                                                                                                                                                                                                                                                                                                                                                                                                                                                                                                                                                                                                                                                                                                                                                                                                                                                                                                                                                                                                                                                                                                                                                                                                                                                                                                                         |
| <b>Corresponding Author:</b>                                                                                                                                                                                                                                                                                      | ZOLEKA PATRICIA NONTLANTLA FILANDER, MSc<br>Department of Environmental Affairs and Tourism: Republic of South Africa<br>Department of Forestry Fisheries and the Environment<br>Cape Town, Western Cape SOUTH AFRICA                                                                                                                                                                                                                                                                                                                                                                                                                                                                                                                                                                                                                                                                                                                                                                                                                                                                                                                                                                                                                                                                                                                                                                                                                                                                                                                                                                                                                                                                                                                                                                                                                                                                     |
| <b>Keywords:</b>                                                                                                                                                                                                                                                                                                  | stony Cold-water corals, longitude, depth, gradients, distribution.                                                                                                                                                                                                                                                                                                                                                                                                                                                                                                                                                                                                                                                                                                                                                                                                                                                                                                                                                                                                                                                                                                                                                                                                                                                                                                                                                                                                                                                                                                                                                                                                                                                                                                                                                                                                                       |
| <b>Abstract:</b>                                                                                                                                                                                                                                                                                                  | Azooxanthellate scleractinian corals, a group of species that lack a symbiotic relationship with dinoflagellates, are influenced by environmental variables at various scales. As the global commitment to sustainably manage ocean ecosystems and resources rises, there is a growing need to describe biodiversity trends in previously unsampled areas. Benthic invertebrate research in South Africa is a developing field, and many taxa in deep water environments remain inadequately characterized. Recently, the South African azooxanthellate scleractinian fauna was taxonomically reviewed, but their distributional correlation with physical parameters have not been studied. Here we aim to understand the biodiversity gradients of the South African azooxanthellate coral fauna by analysing the environmental correlates of museum samples. The associated coordinate data were georeferenced and depth obtained from a national bathymetric dataset, prior to undertaking a multivariate analysis. Overall, our results confirmed two longitudinal groups (eastern margin [group A] vs southern and western margin [group B]) and 11 depths represented within two bathymetric zones (shallow [50-200 m] and deep [300-1000 m]). Both the longitudinal groups and depth zones partially explained coral distribution patterns, with depth highly correlated with species variation. Caryophylliids, flabellids, and dendrophylliids contributed the most towards distinguishing longitudinal and depth gradients. Data limitations within our data set resulted to unexplained variance, however, despite these limitations, the study demonstrates that historical museum samples provide a valuable data source that can fill research sampling gaps and improve our understanding of biodiversity patterns of the coral fauna in under sampled marine ecosystems. |
| <b>Order of Authors:</b>                                                                                                                                                                                                                                                                                          | ZOLEKA PATRICIA NONTLANTLA FILANDER, MSc<br>Kerry Jennifer Sink<br>Marcelo Visentini Kitahara<br>Stephen Cairns, Doctorate<br>Amanda L Lombard                                                                                                                                                                                                                                                                                                                                                                                                                                                                                                                                                                                                                                                                                                                                                                                                                                                                                                                                                                                                                                                                                                                                                                                                                                                                                                                                                                                                                                                                                                                                                                                                                                                                                                                                            |
| <b>Additional Information:</b>                                                                                                                                                                                                                                                                                    |                                                                                                                                                                                                                                                                                                                                                                                                                                                                                                                                                                                                                                                                                                                                                                                                                                                                                                                                                                                                                                                                                                                                                                                                                                                                                                                                                                                                                                                                                                                                                                                                                                                                                                                                                                                                                                                                                           |
| <b>Question</b>                                                                                                                                                                                                                                                                                                   | <b>Response</b>                                                                                                                                                                                                                                                                                                                                                                                                                                                                                                                                                                                                                                                                                                                                                                                                                                                                                                                                                                                                                                                                                                                                                                                                                                                                                                                                                                                                                                                                                                                                                                                                                                                                                                                                                                                                                                                                           |
| <b>Financial Disclosure</b><br><br>Enter a financial disclosure statement that describes the sources of funding for the work included in this submission. Review the <a href="#">submission guidelines</a> for detailed requirements. View published research articles from <a href="#">PLOS ONE</a> for specific | The financial support for this research study was provided by the Department of Forestry, Fisheries, and Environment (DFFE).                                                                                                                                                                                                                                                                                                                                                                                                                                                                                                                                                                                                                                                                                                                                                                                                                                                                                                                                                                                                                                                                                                                                                                                                                                                                                                                                                                                                                                                                                                                                                                                                                                                                                                                                                              |

examples.

This statement is required for submission and **will appear in the published article** if the submission is accepted. Please make sure it is accurate.

#### Unfunded studies

Enter: *The author(s) received no specific funding for this work.*

#### Funded studies

Enter a statement with the following details:

- Initials of the authors who received each award
- Grant numbers awarded to each author
- The full name of each funder
- URL of each funder website
- Did the sponsors or funders play any role in the study design, data collection and analysis, decision to publish, or preparation of the manuscript?
- **NO** - Include this sentence at the end of your statement: *The funders had no role in study design, data collection and analysis, decision to publish, or preparation of the manuscript.*
- **YES** - Specify the role(s) played.

\* typeset

#### Competing Interests

Use the instructions below to enter a competing interest statement for this submission. On behalf of all authors, disclose any [competing interests](#) that could be perceived to bias this work—acknowledging all financial support and any other relevant financial or non-financial competing interests.

This statement is **required** for submission and **will appear in the published article** if the submission is accepted. Please make sure it is accurate and that any funding sources listed in your Funding Information later in the submission form are also declared in your Financial Disclosure statement.

The authors have declared that no competing interests exist.

View published research articles from [PLOS ONE](#) for specific examples.

**NO authors have competing interests**

Enter: *The authors have declared that no competing interests exist.*

**Authors with competing interests**

Enter competing interest details beginning with this statement:

*I have read the journal's policy and the authors of this manuscript have the following competing interests: [insert competing interests here]*

\* typeset

**Ethics Statement**

Enter an ethics statement for this submission. This statement is required if the study involved:

- Human participants
- Human specimens or tissue
- Vertebrate animals or cephalopods
- Vertebrate embryos or tissues
- Field research

Write "N/A" if the submission does not require an ethics statement.

General guidance is provided below. Consult the [submission guidelines](#) for detailed instructions. **Make sure that all information entered here is included in the Methods section of the manuscript.**

N/A

**Format for specific study types**

**Human Subject Research (involving human participants and/or tissue)**

- Give the name of the institutional review board or ethics committee that approved the study
- Include the approval number and/or a statement indicating approval of this research
- Indicate the form of consent obtained (written/oral) or the reason that consent was not obtained (e.g. the data were analyzed anonymously)

**Animal Research (involving vertebrate animals, embryos or tissues)**

- Provide the name of the Institutional Animal Care and Use Committee (IACUC) or other relevant ethics board that reviewed the study protocol, and indicate whether they approved this research or granted a formal waiver of ethical approval
- Include an approval number if one was obtained
- If the study involved *non-human primates*, add *additional details* about animal welfare and steps taken to ameliorate suffering
- If anesthesia, euthanasia, or any kind of animal sacrifice is part of the study, include briefly which substances and/or methods were applied

**Field Research**

Include the following details if this study involves the collection of plant, animal, or other materials from a natural setting:

- Field permit number
- Name of the institution or relevant body that granted permission

**Data Availability**

Authors are required to make all data underlying the findings described fully available, without restriction, and from the time of publication. PLOS allows rare exceptions to address legal and ethical concerns. See the [PLOS Data Policy](#) and [FAQ](#) for detailed information.

Yes - all data are fully available without restriction

A Data Availability Statement describing where the data can be found is required at submission. Your answers to this question constitute the Data Availability Statement and **will be published in the article**, if accepted.

**Important:** Stating 'data available on request from the author' is not sufficient. If your data are only available upon request, select 'No' for the first question and explain your exceptional situation in the text box.

Do the authors confirm that all data underlying the findings described in their manuscript are fully available without restriction?

**Describe where the data may be found in full sentences. If you are copying our sample text, replace any instances of XXX with the appropriate details.**

- If the data are **held or will be held in a public repository**, include URLs, accession numbers or DOIs. If this information will only be available after acceptance, indicate this by ticking the box below. For example: *All XXX files are available from the XXX database (accession number(s) XXX, XXX).*
- If the data are all contained **within the manuscript and/or Supporting Information files**, enter the following: *All relevant data are within the manuscript and its Supporting Information files.*
- If neither of these applies but you are able to provide **details of access elsewhere**, with or without limitations, please do so. For example:

*Data cannot be shared publicly because of [XXX]. Data are available from the XXX Institutional Data Access / Ethics Committee (contact via XXX) for researchers who meet the criteria for access to confidential data.*

*The data underlying the results presented in the study are available from (include the name of the third party*

All relevant data are within the manuscript and its Supporting Information files.

|                                                                                                                                                                                                                                         |                                                                                                                                                                                  |
|-----------------------------------------------------------------------------------------------------------------------------------------------------------------------------------------------------------------------------------------|----------------------------------------------------------------------------------------------------------------------------------------------------------------------------------|
| <p><i>and contact information or URL).</i></p> <ul style="list-style-type: none"><li>• This text is appropriate if the data are owned by a third party and authors do not have permission to share the data.</li></ul> <p>* typeset</p> |                                                                                                                                                                                  |
| Additional data availability information:                                                                                                                                                                                               | Tick here if the URLs/accession numbers/DOIs will be available only after acceptance of the manuscript for publication so that we can ensure their inclusion before publication. |

1 **The application of historic sample-specific variables in evaluating the biodiversity patterns**  
2 **of the South African azooxanthellate scleractinians (Cnidaria: Anthozoa).**

3

4 Zoleka N. Filander <sup>1,2\*</sup>, Kerry J. Sink <sup>3,4</sup>, Marcelo V. Kitahara <sup>5,6</sup>, Stephen D. Cairns <sup>6</sup>, Amanda T.  
5 Lombard <sup>4</sup>.

6

7 **1.** Biodiversity and Coastal Research, Oceans and Coasts, Department of Forestry, Fisheries, and  
8 Environment, Cape Town, South Africa. **2.** Zoology Department, Nelson Mandela University, Port  
9 Elizabeth, South Africa. **3.** South African National Biodiversity Institute, Cape Town, South Africa. **4.**  
10 Institute for Coastal and Marine Research, Nelson Mandela University, Port Elizabeth, South Africa. **5.**  
11 Centro de Biologia Marinha, Universidade de São Paulo, São Sebastião, Brazil **6.** Department of  
12 Invertebrate Zoology, Smithsonian Institution, Washington DC, USA.

13

14 **Corresponding author** [zfilander@gmail.com](mailto:zfilander@gmail.com)

15

16 **Abstract**

17 Azooxanthellate scleractinian corals, a group of species that lack a symbiotic relationship with  
18 dinoflagellates, are influenced by environmental variables at various scales. As the global  
19 commitment to sustainably manage ocean ecosystems and resources rises, there is a growing need  
20 to describe biodiversity trends in previously unsampled areas. Benthic invertebrate research in  
21 South Africa is a developing field, and many taxa in deep water environments remain inadequately  
22 characterized. Recently, the South African azooxanthellate scleractinian fauna was taxonomically  
23 reviewed, but their distributional correlation with physical parameters have not been studied. Here  
24 we aim to understand the biodiversity gradients of the South African azooxanthellate coral fauna

25 by analysing the environmental correlates of museum samples. The associated coordinate data  
26 were georeferenced and depth obtained from a national bathymetric dataset, prior to undertaking  
27 a multivariate analysis. Overall, our results confirmed two longitudinal groups (eastern margin  
28 [group A] vs southern and western margin [group B]) and 11 depths represented within two  
29 bathymetric zones (shallow [50-200 m] and deep [300-1000 m]). Both the longitudinal groups and  
30 depth zones partially explained coral distribution patterns, with depth highly correlated with  
31 species variation. Caryophylliids, flabellids, and dendrophylliids contributed the most towards  
32 distinguishing longitudinal and depth gradients. Data limitations within our data set resulted to  
33 unexplained variance, however, despite these limitations, the study demonstrates that historical  
34 museum samples provide a valuable data source that can fill research sampling gaps and improve  
35 our understanding of biodiversity patterns of the coral fauna in under sampled marine ecosystems.

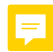

37 **Keywords:** stony Cold-water corals, longitude, depth, gradients, distribution.

38

### 39 **1. Introduction**

40 The distribution of azooxanthellate corals, a group of scleractinian species that lack a symbiotic  
41 relationship with photosynthetic dinoflagellates, is influenced by environmental variables at  
42 various scales (Guinotte et al., 2006; Hovland, 2008; Roberts et al., 2009; Davies and Guinotte,  
43 2011; Angeletti et al., 2020). Physical and chemical oceanographic factors, as well as  
44 geomorphologic settings affect food supply and, consequently, benthopelagic coupling (Roberts  
45 et al., 2009). Overall, depth might be used as a variable linked to several oceanographic factors  
46 that influence species distributions. For example, coral species have preferred thermal ranges  
47 (Davies and Guinotte, 2011), and a global azooxanthellate coral richness trend has been



48 documented between 200 and 1000 m deep. This depth range often coincides with shelf and slope  
49 features, which may provide suitable substrate for larval settlement and habitats for  
50 azooxanthellate coral species to colonise (Cairns, 2007; Roberts et al., 2009). Furthermore, long-  
51 term environmental stability appears to also be important for the occurrence/distribution of deep  
52 water stony coral species. In addition to the temporal and spatial stability of an environment, it is  
53 well established that life history patterns, including reproduction strategies and relationship to  
54 substrate, are of utmost importance for a species' distribution (Oakham, 2009). For instance,  
55 attached deep water scleractinians require consolidated substrates to survive, whilst unattached  
56 forms are found on or in unconsolidated substrates (Roberts et al., 2009; Hovland, 2008).

57  
58 Given the difficulty of sampling in deep-water marine systems, the mapping and classification of  
59 biodiversity into spatial units (which then act as surrogates for unmapped biodiversity) is a  
60 common approach in spatial planning (Waters, 2008; Costello, 2009; Reygondeau and Dunn,  
61 2018; Reygondeau 2019; Richter et al., 2022). Considering the growing concern regarding  
62 declining ocean health, voluntary commitments to reach a national 30 % area protection by 2030,  
63 and the United Nations call for better ocean governance (United Nations, 2018; 2019; 2020), such  
64 spatial classifications are powerful tools to guide conservation and management strategies to  
65 support the achievement of the United Nations 14<sup>th</sup> Sustainable Development Goals (SDGs).  
66 Although ocean basins have been mapped at broad scales (Sayre et al., 2017) and several global  
67 and regional bioregionalisations exist (Ekman, 1953; Briggs, 1974; Spalding et al., 2007; Grant et  
68 al., 2006; Cedras et al., 2020; McQuaid et al., 2023), few studies have used species data to describe  
69 biological patterns in areas deeper than 200 m (Zezina, 1997; O'Hara et al., 2011; Watling et al.,  
70 2013; Cedras et al., 2020; Summers and Watling, 2021; Watling and Lapointe, 2022), particularly

71 within benthic ecosystems (O'Hara et al., 2011; Summers and Watling, 2021; Watling and  
72 Lapointe, 2022). Developing nations, such as South Africa, particularly lack specialised resources  
73 to survey deeper waters, further constraining *in situ* research (Bell et al., 2022). Consequently,  
74 samples housed in scientific collections may be a valuable source of biological data to evaluate  
75 distribution patterns (Spalding et al., 2007; Thandar et al., 1989; Woolley et al., 2020) but should  
76 be interpreted with caution.

77

78 Despite the fact that the first marine collections along South Africa's shores dates back to the  
79 1700s (Day, 1977; Griffiths et al., 2010), ocean resource management is still constrained by the  
80 poor state of knowledge of key invertebrate species (Sink et al., 2019). Endeavouring to address  
81 such species data gaps, local research advancements have recently been initiated by examining  
82 natural history collections (Biccard 2012; Laird 2013; Filander, 2014; Olbers 2016; Boonzaaier,  
83 2017; Landschoff 2011). Some of these studies have been integrated into the ecosystem map  
84 developed by Sink et al. (2019; 2023) for the National Biodiversity Assessment (NBA). The NBA  
85 used pelagic and benthic data, including biological available information (i.e., macrofauna,  
86 epifauna, and fish) to produce an expert-driven ecosystem type map for national reporting  
87 frameworks. It comprises four hierarchical levels that represent six ecoregions (two deep ocean  
88 and four confined to the continental shelf), five depth zones (shore, shelf, slope, plateau, and  
89 abyss), and different substrate types. Absent, however, from this national spatial classification map  
90 is a holistic consideration of the South African azooxanthellate scleractinian fauna, given that this  
91 taxonomic group was only recently reviewed (Filander et al., 2021), and its distribution patterns  
92 had not yet been investigated. The NBA does however report on some distribution records of

93 potential Vulnerable Marine Ecosystem indicator taxa, which includes records of two reef-building  
94 azooxanthellate coral taxa (i.e., Dendrophylliidae Gray, 1847 and Caryophylliidae Dana, 1846).  
95  
96 Earlier international studies (Cairns, 2007) have grouped the available literature on  
97 azooxanthellate Scleractinia into broad geographic regions. Although not a biodiversity analysis,  
98 Cairns (2007) produced an output that served as a starting point for emerging taxonomists in the  
99 field. Cairns and Keller (1993) did, nonetheless, summarise depth affiliations within the southwest  
100 Indian Ocean, in which South African taxa reported off the eastern and southern margins were  
101 represented. Apart from these two publications (Cairns and Keller, 1993; Cairns, 2007), the South  
102 African azooxanthellate Scleractinia distribution pattern have not been investigated in light of its  
103 relationship to physical variables. Therefore, this paper aims to examines the diversity measures  
104 of the South African azooxanthellate coral fauna, with respect to sample-specific environmental  
105 gradients.

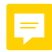

106

## 107 **2. Material and Methods**

108 Data considered for this study were based primarily on a subset of species distribution records for  
109 the South African azooxanthellate scleractinian fauna recently reported by Filander et al. (2021).  
110 The subset was compiled by including those occurrence data with coordinate information and a  
111 sample number, resulting in 761 occurrence records (**Figure 1** and **Appendix A**: Occurrence data).  
112 These coral occurrence data were predominately collected during six historical dredge surveys  
113 undertaken between 1898 and 1990 (i.e., RV *Anton Bruun*, Benguela IV, RV *Meiring Naude*, RV  
114 *Pieter Faure*, Sardinops, and University of Cape Town Ecological Surveys). The recent surveys  
115 undertaken in the 21<sup>st</sup> century are represented by two trawl (NANSEN and Department of

116 Environment, Forestry and Fisheries/South African Environmental Observation Network demersal  
117 surveys) and three dredge research surveys (ACEP: Deep–Secrets and IMIDA surveys,  
118 Department of Environment, Forestry and Fisheries) (see Filander et al., 2021).

119

120 **Figure 1.** Study domain and spatial coverage of the coral records forming the basis of the analysis.

121

122 It is worth noting that the historical data sets had a varying degree of reliability in terms of  
123 associated data and, therefore, required data validation. Consequently, all the occurrence records  
124 were first geo-referenced using ArcGIS 10.1. This step involved overlaying the coral point data on  
125 the National Biodiversity Assessment (Sink et al., 2019; 2023) marine ecosystem types map.

126 Records that were recovered on the coastline were moved to the closest polygon boundary of the

127 ecosystem types with the near command in ArcGIS 10.1. This process was particularly beneficial

128 for the *Pieter Faure* stations, which had positions in degrees magnetic North (not true North);

129 whereby land bearings were used as a reference. In the next step, the spatial join tool was used to

130 assign depth in relation to the most recent national bathymetric dataset (de Wet and Compton,

131 2021) to each of the coral records, irrespective of whether depths were present in the coral archive

132 data set or not. Depth contours started at 50 m and continued every 100 m isobath intervals to a

133 maximum of 1000 m. The resulting data set consisted of 95 of the total 108 azooxanthellate

134 scleractinian species known from South Africa (Filander et al., 2021).

135

## 136 **2.1. Assumptions and sampling biases**

137 Over 80% of the resulting data is of historical origin, and therefore poses some limitations. One of

138 these limitations is sampling coverage bias, given that past national marine surveys focused mainly

139 on nearshore areas due to their accessibility, whilst sampling in areas beyond the continental shelf.

140 relied on international surveys (the *Pieter Faure* expeditions being an exception) (Griffiths et al.,  
141 2010). Nevertheless, these historical surveys represent decades of sampling effort but were not  
142 systematic and provide presence-only data. Secondly, depth and co-ordinate information are the  
143 only two variables commonly associated with such datasets, but may be unreliable in some  
144 instances (i.e., the *Pieter Faure* collection). Thus, the use of the occurrence data in the multi-  
145 variate analysis required three assumptions that may not necessarily be a true reflection of the data  
146 attributes. These include presenting the data as presence-absence, inferring the occurrence of the  
147 historical records to the modern day, and applying longitude and depth as a proxy for ocean basin  
148 and water mass properties; respectively. The above-mentioned two-part data geo-referencing  
149 methodology was therefore also undertaken to standardize the associated collection specific  
150 parameters for the application of longitude and depth data as abiotic variables.

151  
152 Furthermore, the data preparation methodology does not follow the interpolation of the presence-  
153 absence matrix (i.e., if species occur between two extreme points, then occurrence is assumed in  
154 between) as conducted in preceding marine benthic invertebrate studies based on museum  
155 specimens (Filander, 2014; Olbers, 2016; Boonzaaier, 2017). This approach would have yielded  
156 unrealistic conclusions in the absence of fine-scale substrate data sources- as substrate type is one  
157 of the primary drivers of coral settlement. Whereas the 2018 NBA (Sink et al., 2019) sub-divided  
158 substrate into ecosystem types, the multibeam data represented less than 1% of the South African  
159 seabed. Cawthra et al. (2021) review on existing South African core samples collected from areas  
160 deeper than 130 m highlights the importance of high resolution hydroacoustic surveys to better  
161 contextualize published core localities. It is for this reason that the substrate level was not  
162 considered to support interpolation techniques.

163 Lastly, the average taxonomic distinctiveness (ATD) diversity measure was based on the  
164 established phylogenetic clades (Kitahara et al., 2010; Stolarski et al., 2011). However, owing to  
165 limited resolution regarding species relationships below family level, phylogenetic scores were  
166 not assigned to taxonomic levels lower than family. Additionally, the existing phylogenetic  
167 reconstructions still lack sufficient representation of azooxanthellate coral species occurring in  
168 South Africa. For instance, less than 20% of South African coral species have been sequenced and  
169 included in existing molecular trees (Kitahara et al., 2010; Stolarski et al., 2011). It is important to  
170 note that ATD is a diversity calculation method that considers the distance between each species  
171 and its closest relative outside the group. This calculation is then divided by the number of species  
172 within the group being evaluated. The resulting ATD value provides an estimation of the group's  
173 evolutionary uniqueness, with higher values indicating greater distinctiveness. Consequently, an  
174 alphabetically arranged method would yield inaccurate results.

175

## 176 **2.2. Data analysis**

177 A presence-absence matrix (**Appendix A**: presence-absence) of the coral occurrence data was  
178 compiled and all analyses were undertaken using the PRIMER 7 software package (Clarke and  
179 Warwick, 2001; Clarke et al., 2014), with the PERMANOVA+ add on (Anderson et al., 2008).  
180 The matrix, consisting of 488 columns (stations/samples) and 95 rows (species), was converted to  
181 a resemblance matrix. The associated higher taxonomic classifications of these resulting species  
182 identifications were thereafter extracted from the World Register of Marine Species batch match  
183 online function (WoRMS Editorial Board, 2021) (**Appendix A**: Taxonomic attributes). Owing to  
184 the patchy nature of the data set, in which 30 species were represented by only one sample and 22  
185 species by less than ten samples (**Appendix A**: Number of records per species), the Gamma+

186 dissimilarity matrix was selected (Clark and Warwick, 1999; Clark et al., 2006). This measure  
187 used the cophenetic distances derived from the phylogeny established in Kitahara et al. (2010) and  
188 Stolarski et al. (2011) (e.g. “Basal”, “Complex”, and “Robust”) (**Appendix A**: Taxonomic  
189 attributes). Such a procedure allowed for biotic distances among samples to be quantified even  
190 when they had zero or very few species in common.

191  
192 The sample-specific data also required data preparation, which followed the biological data  
193 assessment. Longitude and depth are the two sample-specific variables considered to determine  
194 the environmental settings of the South African maritime domain (**Appendix A**: Sample-specific  
195 abiotic data). For instance if a sample was recorded at a 31° longitude, then it was collected in the  
196 Indian Ocean and influenced by the Agulhas Current. Additionally, water mass temperature (T)  
197 and salinity (S) properties can be confirmed by depth, in which upper layer waters were identified  
198 between the surface and 500 m deep, intermediate between 500 and 1500 m, and abyss greater than  
199 1500 m (Emery, 2003). Each abiotic parameter was firstly classified accordingly (see below), prior  
200 to running an one-way (unordered) similarity analysis (ANOSIM) test to evaluate variation of  
201 corals species within the longitudinal and depth groups (**Appendix A**: Sample-specific abiotic  
202 data). The ANOSIM test requires groupings and measures the mean of ranked dissimilarities  
203 between groups to the mean of ranked dissimilarities within groups. A standard approach was  
204 undertaken to investigate change in species attributes along the longitudinal and depth gradient,  
205 whereby a SIMPER analysis was run to evaluate contributing taxa.

206  
207 To classify the longitudinal data as a factor to be tested on the biological data, an auto select k-R  
208 cluster mean analysis was run on the normalized longitudinal data. A draftsman’s plot was

209 produced to identify the number of longitudinal groups present and validate the cluster groups  
210 present (**Appendix B**: Figure 2). The depth classification starts at a 50 m isobath and progresses  
211 at 100 m increments. These depth readings were further classified according to zone, i.e., shallow  
212 (50-200 m) vs deep (300-1000 m). The depth values and subsequent depth zones were also added  
213 as a factor for testing. Similarity percentage (SIMPER) tests were run independently to distinguish  
214 coral species contributing to the longitudinal groups identified by the k-R mean analysis and depth  
215 groups. Sampling effort (i.e., denoted by N), species richness (denoted by S), Shannon index  
216 (denoted by  $H' \log^e$ ), and taxonomic distinctiveness (denoted by  $\Delta+$ ) across the longitudinal  
217 and depth groups was quantified. The former was investigated by assigning coral records to 50x50  
218 km grids created with the fishnet ArcGis function, whereby the grid size was guided by the  
219 boundary breaks of the k-R mean cluster groups.

220

221 Subsequently, a RELATE routine was undertaken to evaluate if the combined longitude and depth  
222 spatial gradients correspond with those inferred from the coral species patterns. Here we used the  
223 Gamma + matrix in relation to the associated depth and longitude information, which was  
224 normalised into a Euclidean distance resemblance matrix. The RELATE technique calculated a  
225 Spearman's  $\rho$  rank correlation coefficient between all elements of the coral assemblage and  
226 environmental variable resemblance matrices, followed by a permutation test. Following this, a  
227 biota and/or environment matching (BEST) test was conducted to confirm which variable  
228 contributed the most to sample statistic given by the RELATE results. A species accumulation  
229 model was lastly produced to assess how well the current observed azooxanthellate stony coral  
230 data represents South Africa's predicted coral diversity.

231



## 232 3. Results

### 233 3.1. Longitudinal gradient

234 The k-R (non-hierarchical) cluster analysis yielded two longitudinal groups ( $R = 0.94$ ), whereby  
235 group A encompasses samples from the eastern margin of South Africa and group B are samples  
236 from the southern and western margins (**Figure 3**). The SIMPER results suggested that biological  
237 samples represented by each of the two longitudinal clusters had an overall low average similarity  
238 in species composition (**Appendix C**: Long group SIMPER spp results). Communities in group  
239 A, with an average similarity of 3.4 %, were characterised by a total of 11 species from five  
240 families (i.e., Dendrophylliidae, Caryophylliidae, Micrabaciidae Vaughan, 1905, Turbinoliidae  
241 Milne-Edwards & Haime, 1848, and Flabellidae Bourne, 1905). Group B had a total of eight  
242 species contributing to the group identity with a slightly higher average similarity (4.6%), whereby  
243 only two families (i.e., Dendrophylliidae and Caryophylliidae) were represented.

244

245 **Figure 3.** The 50x50 km gridded cells with samples in relation to the longitudinal groups defined by the k-R cluster  
246 analysis. Group A represents samples collected off the eastern margin and group B are samples collected off the  
247 southern and western margins.

248

249 Furthermore, there was a distinction between families contributing the most to the cluster  
250 identities. Three dendrophylliids (*Balanophyllia capensis* Verrill, 1865), *Pourtalopsammia togata*  
251 (van der Horst, 1927), and *Heteropsammia cochlea* (Spengler, 1781) contributed the most to the  
252 similarity within group A; and the caryophylliids (*Trochocyathus* sp. 2 sensu Filander et al. (2021),  
253 *Caryophyllia stellula* Cairns, 1998, and *Desmophyllum dianthus* (Esper, 1794)) defined group B.  
254 When comparing the two groups, a 98% average dissimilarity was observed when investigating  
255 species contributing to a minimum cut off of 70%, whereby different species influenced group

256 distinction. *Heteropsammia cochlea*, *Letepsammia franki* (Owens, 1994), *Flabellum pavoninum*  
 257 (Lesson, 1831), and *Labyrinthocyathus delicatus* (Marenzeller, 1904) were represented only in  
 258 group A. Among these species, *L. delicatus* is restricted to the Indian Ocean, whilst *L. franki*, *F.*  
 259 *pavoninum* and *H. cochlea* are widely distributed in the Indo-Pacific. Four species contributed the  
 260 most to group B, of which two are restricted to South African waters (*Ednapsammia*  
 261 *columnapravia* Filander, 2021 and *Dendrophyllia* sp. 1 sensu Filander et al. (2021)), one  
 262 considered cosmopolitan (*Desmophyllum pertusum* (Linnaeus, 1758)), and the remaining reported  
 263 from the Atlantic and Indian ocean basins (*Enallopsammia pusilla* (Alcock, 1902)) (**Appendix C:**  
 264 Long Group SIMPER spp results).

265  
 266 Overall, the number of samples between the two groups varied, whereby group A (eastern margin)  
 267 had over two times more samples than group B (southern and eastern margin) (**Table 1**). Contrary  
 268 to this, the related area (i.e., number of grids) representing these samples was larger in group B  
 269 than in group A (**Table 1**). Diversity followed the same pattern of higher measures in group A as  
 270 compared with group B.

271

272 **Table 1.** Summary of sampling effort in relation to longitudinal gradient

| k-R cluster group                | Number of samples | Number of 50x50<br>km grids | Species<br>richness | Shannon's<br>Index | Delta + |
|----------------------------------|-------------------|-----------------------------|---------------------|--------------------|---------|
| A (eastern margin)               | 569               | 37                          | 86                  | 3.964              | 90.907  |
| B (southern & western<br>margin) | 192               | 43                          | 37                  | 3.249              | 89.289  |

273

### 274 3.2. Depth gradients

275 A direct relationship between the number of samples (N), species richness (S), and depth was  
276 observed (**Figure 4**). The highest number of samples and observed species richness occurred  
277 between depths of 50 and 200 m, with the greatest species richness and sample count recorded at  
278 a depth of 50 m. The same two measures (S and N) fluctuated at the deep bathymetric zone (i.e.,  
279 300-1000 m). Within this deep zone, the highest coral diversity measures (S and N) were recorded  
280 at 1000 m and the lowest at 800 m. The overall pattern suggests that species richness is influenced  
281 by depth and sampling effort, but other factors may also play a role in shaping patterns of species  
282 diversity across different depths. Average taxonomic distinctiveness (denoted by  $\Delta+$ ), which  
283 takes into account species phylogeny, did not show a clear pattern in coral diversity with depth  
284 and species diversity was relatively constant from 50 to 200 m. However, according to this  
285 measure, coral diversity was slightly higher at 1000 m despite the usage of a smaller number of  
286 samples from this depth (42 samples compared to 269 samples at 50 m). In other words, eight  
287 taxonomic families were recorded at 1000 m, while only seven were recorded at 50 m. In contrast,  
288 however, the conservative Shannon diversity index mirrored the pattern of species richness with  
289 depth (**Figure 4**).

290

291 **Figure 4.** The relationship between number of coral samples (N) and species richness (S) in conjunction with the  
292 average taxonomic distinctiveness ( $\Delta+$ ) and Shannon diversity ( $H' \log^e$ ) index measures across depth gradients.  
293 The x-axis shows samples represented in depth values in metres and the y-axis shows values that represent diversity  
294 measures in arbitrary units. The inset shows the Shannon diversity ( $H' \log^e$ ) index repeated on a Y axis of 1-4.

295

296 The SIMPER results of the coral species data according to family suggested that the Caryophylliids,  
297 dendrophylliids, and flabellids were the main contributing taxa towards both the shallow (50-200  
298 m) and deep (300-1000m) stations. Whilst all three families collectively contributed towards the

299 zone comparison (i.e., shallow *vs* deep) at a 70% cut, the Caryophylliidae representatives were  
300 more abundant in the deep stations compared with the Dendrophylliidae and the Flabellidae in the  
301 shallow stations (**Appendix C**: Depth zones SIMPER family results).

302  
303 When comparing the two bathymetric zones at lower taxonomical rankings, three species were  
304 exclusively recorded in the shallower zone (*Rhizopsammia compacta* Sheppard & Sheppard, 1991,  
305 *Truncatoflabellum inconstans* (Marenzeller, 1904), and *Dendrophyllia cornigera* (Lamarck,  
306 1816)), whereas the deeper zones were characterized by three of the four species restricted to the  
307 longitudinal group B: *E. columnaravia*, *Dendrophyllia* sp. 1, and *E. pusilla*.

308  
309 **3.2. The correlation of sample-specific variables (longitude and depth groups) to coral**  
310 **distribution patterns**

311 The one-way ANOSIM results, which evaluated the rank differences in the coral pattern that may  
312 be explained by the longitudinal k-R clusters and depth groupings independently, showed that the  
313 two longitudinal clusters ( $R=0.05$ ,  $p = 0.001$ ), and the eleven depth groupings ( $R = 0.072$ ,  $p =$   
314  $0.001$ ) of the biological assemblages differed significantly from one another (**Appendix D**: Figure  
315 5). Depth also showed significant differences ( $R = 0.105$ ,  $p = 0.001$ ) when grouped as shallow (50-  
316 200 m) and deep zones (300-500 m) (**Appendix D**: Figure 6). Nonetheless, even though some  
317 overlap was observed in the coral structure when testing longitude and depth; the null hypothesis  
318 (of no differences in rank groups) can be rejected.

319  
320 The RELATE results showed a marginal correlation (Rho-value = 0.087) but a significant  
321 difference ( $p$ -value = 0.001) when comparing the coral patterns modelled by the Gamma+

322 resemblance matrix to that of the Euclidean distance matrix (i.e., environmental variables -  
323 longitude and depth; **Figure 7**). It is important to note that the null hypothesis in the RELATE  
324 function is that there is no correlation. Thus, although the correlation is closer to zero (unexplained  
325 variance), the p-value confirms that longitude and depth are good predictors for the coral  
326 distribution patterns. The BEST results further confirmed that depth had an independent  
327 correlation value of 0.094, whilst both environmental parameters (longitude and depth) accounted  
328 for a correlation value of 0.097.

329

330 **Figure 7.** Simulated distribution/histogram of the test statistic Rho under the null hypothesis that there is no  
331 correlation between the modelled coral patterns and that of the environmental variables  $Rho = 0.041$ .

332

333 The majority of the species accumulation curves, which show how the number of species detected  
334 (i.e., observed or sampled) increases with increasing sampling effort (i.e., the number of  
335 individuals or samples collected), did not reach a plateau (**Figure 8**). All seven estimated curves,  
336 along with the observed or sampled species, started with a steep slope and indicated a rapid  
337 increase in the number of species observed with increasing sampling effort. Only two (MM and  
338 UGE) of the seven estimator curves followed the species observed pattern (Sobs), which appears  
339 to be levelling off as the sampling effort increases (**Figure 8**).

340

341 **Figure 8.** Species richness accumulation curve showing the species observed (Sobs= blue upright triangle) in  
342 relation to five estimators (Chao 1= red downward triangle, Chao 2= green square, Jacknife 1= pink diamond,  
343 Jacknife 2= blue circle, Bootstrap= grey cross). Two pairs of curves overlap, whereby the UGE estimator curve  
344 follows the same pattern as the Sobs and the Chao1 has the same pattern as Chao 2.

345

346 **4. DISCUSSION**

347 The multivariate analyses suggests that the sample-specific associated data (e.g., longitude and  
348 depth) are significant predictor variables for azooxanthellate Scleractinia coral diversity.  
349 Nonetheless, unexplained variance exists. Diversity measures were assessed, in which the number  
350 of samples showed an inversely proportional relationship with species richness. Contrary to this  
351 observation, taxonomic distinctiveness (a diversity measure independent of the number of  
352 samples) revealed an opposing pattern to that of the univariate Shannon index measure. Thus,  
353 taxonomic distinctiveness accounted for the uneven species distribution across the South African  
354 continental maritime domain.

355

356 An increasing species turnover along the west to east gradient was observed in our analysis. Such  
357 distributional patterns have long been reported for other South African marine invertebrates (e.g.,  
358 Lang, 2012; Filander, 2014; Boonzaaier, 2017), suggesting that different oceanographic conditions  
359 are influencing the South African marine fauna. The accompanying current regimes may also  
360 govern these contrasting species profiles across the region. Thus, although the two longitudinal  
361 boundaries (Group A = eastern margin vs Group B= western margin) established by the k-R mean  
362 cluster analysis do not conform to the previously proposed oceanographic boundaries (Longhurst,  
363 2007; Spalding et al., 2012;), the ANOSIM suggested a species pattern that may be explained by  
364 the two longitudinal groups. These margins correspond to varying oceanographic variables and  
365 currents, whereby the eastern margin (group A) is situated within the oligotrophic waters of the  
366 Indian oceanic basin and influenced by the western boundary Agulhas current. Interestingly, group  
367 B encompasses the southern and western margins located in both the Indian and Atlantic basins  
368 respectively. At the southern margin, the Agulhas current retroflects, moving away from the shelf,

369 and introduces Indo-Pacific waters into the Atlantic Ocean, the latter being regulated by the  
370 northward flowing Benguela current (Shannon, 1985).

371

372 The SIMPER results detailed a clear taxonomic/ family and species distinctions within these two  
373 longitudinal groups. Dendrophylliids contributed the most to Group A samples and caryophylliids  
374 to Group B. Additionally, the exclusivity in species found between Group A (*H. cochlea*, *L. franki*,  
375 *F. pavinsonum*, and *L. delicatus*) and Group B (*E. columnarpravia*, *Dendrophyllia* sp. 1, *D.*  
376 *pertusum*, and *E. pusilla*) (see longitudinal gradient results) corroborates with the proposal that  
377 species have a temperature threshold (Roberts et al., 2009; Cairns, 2007). The physiological  
378 characteristics of azooxanthellate coral species are indeed influenced by the properties of ambient  
379 water temperature (Gori et al., 2016; Castellan et al., 2019). For example, an *ex-situ* experiment  
380 undertaken on the reef-building corals *D. pertusum* and *Madropora oculata* revealed that they  
381 respond differently when exposed to three temperatures (12, 9.0, and 6.0 °C; Naumann et al.,  
382 2014). The respiration response rates varied; *M. oculata* declined whereas *D. pertusum* was not  
383 affected by temperatures being lowered. Two other physiological responses (i.e., calcification and  
384 dissolved organic carbon) were measured, and neither showed a consistent trend when comparing  
385 the two species. Thus, species belonging to different families or even congeners are expected to  
386 exhibit varying thermal tolerance.

387

388 The recovered species longitudinal pattern of low sampling effort in Group A (eastern margin) but  
389 higher number of records and diversity observed herein, was particularly surprising as the western  
390 margin (which contributes to Group B) has a higher historic sampling effort (Griffiths et al., 2010).  
391 The greater presence of coral species in the eastern Agulhas region (Group A) may be explained

392 by the heterogenous seabed substrate types provided by the increased abundance of mesophotic  
393 reefs, submarine canyons, and mosaic ecosystem types (Sink et al., 2019). Whilst the incising  
394 submarine canyons along the eastern continental margin (Green et al., 2007; Green, 2008; 2009;  
395 Green, 2011) may also give rise to a heterogenous environment, localised canyon substrate type  
396 studies need to be undertaken to confirm such hypothesis (Filander et al., 2022). Even though the  
397 Benguela Current in the South Atlantic (influencing the western passive margin) is unique in its  
398 interactions with the western boundary Agulhas current (Longhurst, 2007), this region has  
399 substrate predominately unconsolidated, resulting in a more homogenous environment  
400 (Dingle, 1979; Cawthra et al., 2021; Filander et al., 2022). Additionally, dissolved oxygen levels  
401 have been proposed to affect scleractinian growth (Hanz et al., 2019) and the Southern Benguela  
402 Upwelling region does include a low-oxygen area/cell off St Helena Bay (Lamont et al., 2015).  
403 Though nearshore, such cells are reported to show spatial variability and may modify offshore  
404 upwelling water masses. These oxygen parameters superimposed with unconsolidated bottom  
405 types and a slow current ( $< 3$  m/s) may be a constraint for coral presence. The presence of coral is  
406 however influenced by multiple factors operating at different scales, and it is crucial to consider  
407 species-specific regional adaptation abilities to environmental gradients (i.e., dissolved oxygen) -  
408 even for cosmopolitan species (Orejas et al., 2021). Nonetheless, the prominence of anthropogenic  
409 activities that interact with the seabed in the Southern Benguela Upwelling area (Atkinson et al.,  
410 2011; Majiedt et al., 2019) cannot be overlooked and may also influence the low number of species  
411 records in the area.

412

413 The southern margin, which contributes to Group B, is a unique area that exhibits minimal  
414 interaction with other landmasses and, as such, high endemism has been noted (Griffiths et al.,



415 2010). In this region, the Agulhas current injects Indo-Pacific waters into the Atlantic, down to  
416 depths of 2000 m in the form of anticyclonic rings (Beal et al., 2011), before retroreflecting  
417 eastwards towards the Southern Indian Ocean Gyre and the Antarctic circumpolar current  
418 (Spalding et al., 2012). Schouten et al. (2000) noted that the location of the retroflexion loop is  
419 variable, but still within the southern region. Nonetheless, the Agulhas transport is estimated to  
420 increase from 65 Sv ( $1\text{Sv} = 10^6 \text{ m}^3\text{s}^{-1}$ ) at 32°S to 95 Sv at the southern tip of South Africa, as it  
421 breaks away from the shelf (Gordon et al., 1992; Duncombe Rae, 1991). Thus, the unpredictable  
422 behaviour and velocity of the Agulhas current make this area challenging for sampling and,  
423 therefore, the low number of records here may be attributed to limited sampling effort.

424

425 The analysis of depth gradients allowed patterns of species richness in relation to the depth to be  
426 better understood. These results complement the longitudinal gradients whereby the univariant  
427 biodiversity measures peaked at 50 m, which corresponds to the accessible eastern margin of the  
428 South African maritime domain. In addition to the shelf being shallower (~ 50-150 m) and more  
429 accessible, the western boundary Agulhas current (characteristic of this area) has been linked to  
430 the highly diverse biological properties in the Southwest Indian Ocean, where eddies can trap and  
431 transport material over long distances (Halo et al., 2014). These complex oceanographic eddies  
432 can upwell deep nutrient-rich waters through surface divergence mechanisms (Halo et al., 2014),  
433 creating environments that favour the continuous inflow of potential food sources. Thus, these  
434 observations may provide grounds for a hypothesis to explain why azooxanthellate corals have a  
435 higher presence within this area.

436

437 The multivariate taxonomic average distinctiveness measure (denoted by  $\Delta$ ) showed diversity  
438 to be highest at 1000 m, in which eight of the eleven known South African coral families are  
439 represented. This result aligns with the knowledge that the global azooxanthellate stony coral  
440 pattern (Cairns, 2007) has overall higher species diversity between the 200 and 1000 m.  
441 Irrespective, the SIMPER analysis distinguished three major families to contribute to bathymetric  
442 zone delineation. The deeper depths (300-1000 m) were characterized by caryophylliids and  
443 flabellids, and the shallow zone (50-200 m) by dendrophylliids. These results conform with the  
444 known depth affiliations of these families, in which Dendrophylliidae species occurrence is  
445 reported to peak at shallower depths (50 to 300 m) (Cairns, 2001) and extant species of  
446 Caryophylliidae and Flabellidae are more prominent in the deeper waters (more than 200 m)  
447 (Kitahara, 2011).

448

449 The two sample-specific (i.e., depth and longitude) data sets were applied in combination to  
450 extrapolate ocean basin properties (nutrient content, salinity, temperature, etc.), which characterise  
451 the oceanographic settings influencing South African marine fauna (i.e., the colder Benguela  
452 current along the western margin, and the warmer Agulhas current along the southern and eastern  
453 margin). In this context, the permutation models (ANOSIM and RELATE) imply that longitude  
454 and depth are good predictors for coral distribution patterns. However, the close to zero R-values  
455 ( $R < 0.5$ ) suggests a non-linear relationship even though significant variability is evident in the  
456 species composition within the factorial groups. Whilst depth is noted to be one of the main drivers  
457 for coral distribution (as shown by BEST results), it is important to recognize that this parameter  
458 encompasses several other properties, such as the Aragonite Saturation Horizon (ASH) that is the  
459 depth below which calcium carbonate becomes unstable and tends to dissolve (Jiang et al., 2015;

460 Guinotte et al., 2006). Such a zone has been estimated at 700-1500 m depth range south of ~ 20°S  
461 (Jiang et al., 2015). Eight of the eleven known South African coral families are recorded within  
462 this depth range, suggesting these species are surviving within an aragonite saturation state.  
463 Interestingly, coral species have been previously reported to withstand saturating conditions. For  
464 example, a study undertaken in the Caribbean basin showed the depth of the aragonite saturation  
465 horizon to be strongly related to coral assemblage variation, whereby *M. oculata* and *S. variabilis*  
466 occur in patchy distributions at or above the saturation zone (Auscavitch et al., 2020). The response  
467 of coral species to water properties, such as the ASH, are in no way consistent, highlighting the  
468 need for further research to comprehend the underlying environmental drivers of coral distribution.  
469

470 Although the azooxanthellate coral data reported herein represent an accumulation of samples over  
471 30 years and are the best available representation of the South African fauna, all species richness  
472 estimator models did not plateau, demonstrating that the area is still not well sampled and may be  
473 much more diverse than currently known. The shape and slope of the curve typically provides  
474 information on the species richness, evenness, and heterogeneity of the community being sampled,  
475 as well as the adequacy of the sampling effort. In other words, if the species accumulation curve  
476 keeps increasing with additional sampling effort then full extent of species diversity within the  
477 study area has not yet been captured. Without a doubt, additional sampling coverage will provide  
478 clearer conclusions on national coral diversity trends.

479

#### 480 **4. Conclusion and recommendations**

481 This study examined the best available data for the South African azooxanthellate coral fauna and  
482 presented a pre-processing methodology that caters for historical samples. Differences in

483 azooxanthellate coral species across South Africa's diverse and dynamic oceanographic conditions  
484 were revealed, whereby species turnover increased on a west to east axis. A species depth gradient  
485 was additionally observed, in which the multivariate diversity measure complemented the existing  
486 knowledge on taxa trends. These patterns were evident despite the data limitations related to  
487 museum samples. Whilst the lack of museum associated abiotic data still exists, the methodology  
488 to standardize co-ordinate information and depth may be considered in other data sets with similar  
489 attributes to inform further research to elucidate diversity patterns. In general, historical collections  
490 (which represent years of sampling effort) provide a valuable biological data source but require  
491 thorough validation. Despite the sparsity and unbalanced nature of the data, knowledge has been  
492 advanced and sampling gaps identified. A purposeful application for this existing coral data set  
493 will be its integration into multi-taxa biogeography analyses that will support ecosystem  
494 description and delineation. The data set will also be valuable for spatial prioritisation and marine  
495 spatial planning, particularly alongside taxa that share similar abiotic requirements.

496

#### 497 **Acknowledgements**

498 A sincere acknowledgement goes to Dr David Herbert (Department of Natural Sciences, National  
499 Museum Wales) who assisted with associated station data for the *Meiring Naude* and *Sardinops*  
500 collections. Dr Carl Palmer (Alliance of Collaboration in Climate and Earth System Science) is  
501 thanked for proof-reading the first manuscript draft, and Dr Victoria Goodall (Nelson Mandela  
502 University) for reviewing the data analysis section. Mr Ashley Johnson and Dr Lauren Williams  
503 (Department of Fisheries, Forestry, and the Environment) provided words of encouragement and  
504 ArcGIS technical support; respectively.

505

506 **References**

507 1. Alcock A. Diagnoses and descriptions of new species of corals from the “Siboga-  
508 Expedition”. Tijdschrift der Nederlandsche Dierkundige Vereeniging. 1902; 7(2): 89–115.

509

510 2. Angeletti L, Castellan G, Montagna P, Remia A, Taviani M. The “Corsica Channel Cold-  
511 Water Coral Province”(Mediterranean Sea). Front Mar Sci. 2020; p.661.

512 <https://doi.org/10.3389/fmars.2020.00661>

513

514 3. Anderson MJ, Gorley RN, Clarke KR. PERMANOVA+ for PRIMER: guide to software  
515 and statistical methods. Plymouth, UK: PRIMER-E; 2008.

516

517 4. Atkinson LJ, Field JG, Hutchings L. Effects of demersal trawling  
518 along the west coast of southern Africa: multivariate analysis of benthic assemblages. Mar Ecol  
519 Prog Ser. 2011; 430, 241–255. doi: 10.3354/meps08956

520

521 5. Auscavitch SR, Lunden JJ, Barkman A, Quattrini AM, Demopoulos AW, Cordes EE.  
522 Distribution of deep-water scleractinian and stlyasterid corals across abiotic environmental  
523 gradients on three seamounts in the Anegada Passage. PeerJ. 2020; 8, p.e9523.

524

525 6. Beal L, De Ruijter W, Biastoch A, Zahn R, SCOR/WCRP/IAPSO Working group. On the  
526 role of the Agulhas system in ocean circulation and climate. Nature. 2011 ; 472, 429–436.

527 <https://doi.org/10.1038/nature09983>

528

529 7. Bell KLC, Quinzin MC, Poulton S, Hope A, Amon, D. (Eds.). Global Deep-Sea Capacity  
530 Assessment. Ocean Discovery League, Saunderstown, USA; 2022.

531 <http://doi.org/10.21428/cbd17b20.48af7fcb>

532

533 8. Biccard A. Taxonomy, systematics and biogeography of South African Cirripedia  
534 (Thoracica). M.Sc. Thesis, University of Cape Town. 2012. Available from:

535 <http://hdl.handle.net/11427/10163>

536

537 9. Boonzaaijer MK. Diversity and Zoogeography of South African Bryozoa. Doctoral thesis,  
538 University of Western Cape. 2017. Available from: <http://hdl.handle.net/11394/6308>

539

540 10. Bourne GC. Report on the solitary corals collected by Professor Herdman, at Ceylon, in  
541 1902. Report to the Government of Ceylon on the Pearl Oyster Fisheries of the Gulf of Manaar.  
542 1905; 4: 187-241, pls. 1-4.

543

544 11. Briggs JC. Operation of zoogeographic barriers. Syst Biol. 1974 Jun 1;23(2):248-56.

545

546 12. Cairns S. Azooxanthellate Scleractinia (Cnidaria: Anthozoa) of western Australia.  
547 Records of the Western Australian Museum. 1998; 18: 361–417.

548 <https://repository.si.edu/handle/10088/2465>

549

- 550 13. Cairns SD. Deep-water corals: an overview with special reference to diversity and  
551 distribution of deep-water scleractinian corals. Bull Mar Sci. 2007 Nov 1;81(3):311-  
552 22.<https://repository.si.edu/handle/10088/7536>  
553
- 554 14. Cairns S. A generic revision and phylogenetic analysis of the Dendrophylliidae (Cnidaria:  
555 Scleractinia). 2001. <https://doi.org/10.5479/si.00810282.615>  
556
- 557 15. Cairns S, Keller N. New taxa distributional records of azooxanthellate Scleractinia  
558 (Cnidaria, Anthozoa) from the tropical southwest Indian Ocean, with comments on their  
559 zoogeography and ecology. Ann S Afr. Mus. 1993; 103, 213–292.  
560
- 561 16. Castellan G, Angeletti L, Taviani M, Montagna P. The yellow coral *Dendrophyllia*  
562 *cornigera* in a warming ocean. Front Mar Sci 2019; 6, p.692.  
563
- 564 17. Cawthra HC, Bergh EW, Wiles EA, Compton JS. Late Quaternary deep marine sediment  
565 records off southern Africa. S Afr J Geol. 2021; 124(4), pp.1007-1032.  
566
- 567 18. Cedras R, Halo I, Gibbons M. Biogeography of pelagic calanoid copepods in the Western  
568 Indian Ocean. Deep Sea Res. 2020; 179, 104740. <https://doi.org/10.1016/j.dsr2.2020.104740>  
569
- 570 19. Clarke K, Warwick R. The taxonomic distinctness measure of biodiversity: weighting of  
571 step lengths between hierarchical levels. Mar Ecol Prog Ser. 1999; 184, pp.21-29.  
572

573 20. Clarke K, Somerfield P, Chapman M. On resemblance measures for ecological studies,  
574 including taxonomic dissimilarities and a zero-adjusted Bray–Curtis coefficient for denuded  
575 assemblages. *J Exp Mar Biol and Ecology*. 2006; 330(1), pp.55-80.

576

577 21. Clarke K, Gorley R, Somerfield P, Warwick R. Change in marine communities: an  
578 approach to statistical analysis and interpretation. Primer-E Ltd. 2014.

579

580 22. Costello M. Distinguishing marine habitat classification concepts for ecological data  
581 management. *Mar Ecol Prog Ser*. 2009; 397, 253–268. <https://doi.org/10.3354/meps08317>

582

583 23. Dana J. Zoophytes. Volume VII of the United States Exploring Expedition during the  
584 years 1838, 1839, 1840, 1841, 1842, under the command of Charles Wilkes, USN. Lea &  
585 Blanchard, Philadelphia, 740 pp. 1846. Available from: <https://doi.org/10.5962/bhl.title.70845>

586

587 24. Davies A, Guinotte J. Global habitat suitability for framework-forming cold-water  
588 corals. *PloS one*. 2011; 6(4), p.e18483. <https://doi.org/10.1371/journal.pone.0018483>

589

590 25. Day JH. Marine biology in South Africa. In: Brown AC, editor. A history of scientific  
591 endeavour in South Africa. Cape Town: Royal Society of South Africa. pp. 86–108. 1997

592

593 26. de Wet WM, Compton JS. Bathymetry of the South African continental shelf. *Geo-*  
594 *Marine Letters*. 2021 Sep;41(3):40.



595

596 27. Dingle RV. Sedimentary basins and basement structures on the continental margin of  
597 southern Africa. Bull Geol Surv S Afr. 1979; 63, 29–43.

598

599 28. Duncombe Rae C. Agulhas retroflexion rings in the South Atlantic Ocean: an  
600 overview. S Afri J Mar Sci. 1991; 11(1), pp.327-344.

601 <https://doi.org/10.2989/025776191784287574>

602

603 29. Ekman S. Zoogeography of the sea: Sidgwick and Jackson. Ltd, London. 1953.

604

605 30. Emery WJ. Water types and water masses. Encyclopedia of ocean sciences. 2001; 6,  
606 pp.3179-3187.

607

608 31. Esper E. Fortsetzungen der Pflanzenthiere. vol. 1, parts 1–2. Nürnberg, 64 pp. 1794.

609

610 32. Filander Z. Systematics and biodiversity of South African sea urchins. M.Sc. Thesis  
611 University of Cape Town. 2014.

612

613 33. Filander Z, Kitahara M, Cairns S, Sink K, Lombard A. Azooxanthellate Scleractinia  
614 (Cnidaria, Anthozoa) from South Africa. ZooKeys. 2021.

615 <https://doi.org/10.3897/zookeys.1066.69697>

616

617 34. Filander Z, Smith AN, Cawthra HC, Lamont T. Benthic species patterns in and around  
618 the Cape Canyon: A large submarine canyon off the western passive margin of South Africa.  
619 Front Mar Sci. 2022; 9. <https://doi.org/10.3389/fmars.2022.1025113>

620

621 35. Gordon A, Weiss R, Smethie Jr W, Warner M. Thermocline and intermediate water  
622 communication between the South Atlantic and Indian Oceans. J Geophys Res. 1992; 97(C5),  
623 pp.7223-7240. <https://doi.org/10.1029/92JC00485>

624

625 36. Gori A, Ferrier-Pagès C, Hennige SJ, Murray F, Rottier C, Wicks LC, Roberts JM.  
626 Physiological response of the cold-water coral *Desmophyllum dianthus* to thermal stress and  
627 ocean acidification. PeerJ. 2016; 4:e1606 <https://doi.org/10.7717/peerj.1606>

628

629 37. Grant S, Constable A, Raymond B, Doust S. Bioregionalisation of the Southern Ocean.  
630 Report of an expert workshop, Hobart, Australia, September 2006. World Wildlife Fund–  
631 Australia and Antarctic Climate and Ecosystems Cooperative Research Centre. 2006.

632

633 38. Gray J.. An outline of an arrangement of stony corals. Ann Mag Nat Hist. 1847; (1)19:  
634 120–128. <https://doi.org/10.1080/037454809496460>

635

636 39. Green AN, Goff JA, Uken R. Geomorphological evidence for upslope canyon-forming  
637 processes on the northern KwaZulu-Natal shelf, SW Indian Ocean, South Africa. Geo-Mar Lett.  
638 2007; 27(6), pp.399-409.

639

640 40. Green A, Uken, R. Submarine landsliding and canyon evolution on the northern  
641 KwaZulu-Natal continental shelf, South Africa, SW Indian Ocean. Mar Geol. 2008; 254(3-4),  
642 pp.152-170.

643

644 41. Green A. Sediment dynamics on the narrow, canyon-incised and current-swept shelf of  
645 the northern KwaZulu-Natal continental shelf, South Africa. Geo-Mar Lett. 2009; 29(4), pp.201-  
646 219.

647

648 42. Green A. Submarine canyons associated with alternating sediment starvation and shelf-  
649 edge wedge development: Northern KwaZulu-Natal continental margin, South Africa. Mar Geol.  
650 2011; 284(1-4), pp.114-126.

651

652 43. Griffiths C, Robinson T, Lange L, Mead A. Marine biodiversity in South Africa: an  
653 evaluation of current states of knowledge. PloS one. 2010; 5(8), p.e12008.

654

655 44. Guinotte J, Orr J, Cairns S, Freiwald A, Morgan L, George R. Will human- induced  
656 changes in seawater chemistry alter the distribution of deep- sea scleractinian corals?. Front Ecol  
657 Environ. 2006; 4(3), pp.141-146. [https://doi.org/10.1890/1540-](https://doi.org/10.1890/1540-9295(2006)004[0141:WHCISC]2.0.CO;2)

658 [9295\(2006\)004\[0141:WHCISC\]2.0.CO;2](https://doi.org/10.1890/1540-9295(2006)004[0141:WHCISC]2.0.CO;2)

659

660 45. Halo I, Penven P, Backeberg B, Ansorge I, Shillington F, Roman R. Mesoscale eddy  
661 variability in the southern extension of the East M Madagascar Current: Seasonal cycle, energy  
662 conversion terms, and eddy mean properties. *J Geophys Res.* 2014; 119(10), pp.7324-7356.

663

664 46. Hanz U, Wienberg C, Hebbeln D, Duineveld G, Lavaleye M, Juva K, Dullo WC,  
665 Freiwald A, Tamborrino L, Reichart G.J, Flögel, S. Environmental factors influencing benthic  
666 communities in the oxygen minimum zones on the Angolan and Namibian margins.  
667 *Biogeosciences.* 2019; 16(22), pp.4337-4356.

668

669 47. Horst van der C. Eupsammid corals from South Africa. Union of South Africa Fisheries  
670 and Marine Biological Survey Report 5 (special reports). 1927; 1, 2: 1–7.

671

672 48. Hovland M.. Deep-water coral reefs: Unique biodiversity hot-spots Springer Science &  
673 Business Media. 2008.

674

675 49. Jiang L, Feely R, Carter B, Greeley D, Gledhill D, Arzayus K. Climatological  
676 distribution of aragonite saturation state in the global oceans. *Glob Biogeochem Cycles.* 2015;  
677 29(10), pp.1656-1673. <https://doi.org/10.1002/2015GB005198>

678

679 50. Kitahara VM. Morphological and molecular systematics of scleractinian corals (Cnidaria,  
680 Anthozoa), with emphasis on deep-water species. PhD. Thesis.. James Cook University. 2011.

681

682 51. Laird M. Taxonomy, systematics and biogeography of South African actiniaria and  
683 corallimorpharian. PhD. Thesis. University of Cape Town, South Africa, 236 pp. 2013.

684 Available from: <http://hdl.handle.net/11427/6117>

685

686 52. Lamarck J.-B. M. de. Histoire naturelle des animaux sans vertèbres. Tome second. Paris:  
687 Verdrière, 568 pp. 1816. Available online at <http://www.biodiversitylibrary.org/item/47698>

688

689 53. Lamont T, Hutchings L, van den Berg MA, Goschen WS, Barlow RG. Hydrographic  
690 variability in the St. Helena Bay region of the southern Benguela ecosystem. J Geophys Res.  
691 2015; 120(4), pp.2920-2944.

692

693 54. Landschoff J. Contributions to the taxonomy of South African hermit crabs (Crustacea:  
694 Decapoda: Paguroidea) – integrating microCT scanning and barcoding. PhD. Thesis. University  
695 of Cape Town, South Africa, 242 pp. 2018. Available from: <http://hdl.handle.net/11427/28431>

696

697 55. Lange L. Use of demersal bycatch data to determine the distribution of soft-bottom  
698 assemblages off the West and south coasts of South Africa. PhD. Thesis. University of Cape  
699 Town). 2012. Available from: <http://hdl.handle.net/11427/10899>

700

701 56. Lesson R. Illustrations de Zoologie. Arthus Bertrand, Paris, 3 pp. 1831. Available from:  
702 <http://www.biodiversitylibrary.org/item/91260>

703

704 57. Linnaeus C. *Systema Naturae per Regna Tria Naturae, Secundum Classes, Ordines,*  
705 *Genera, Species, Cum Characteribus, Differentiis, Synonymis, Locis.* Edition Decima,  
706 *Reformata.* Laurentius Salvius: Holmiae, ii, 824 pp. 1758. Available from:  
707 <https://doi.org/10.5962/bhl.title.542>

708

709 58. Longhurst A. *Ecological Geography of the Sea*, seconded. Academic Press. 2007.

710

711 59. Majiedt PA, Holness S, Sink KJ, Reed J, Franken M, van der Bank MG, Harris LR,  
712 Adams L, Perschke M, Miza SA, Currie J, Dunga LV. Chapter 4: Pressures on Marine  
713 Biodiversity. In: Sink KJ, van der Bank MG, Majiedt PA, Harris LR, Atkinson LJ, Kirkman SP,  
714 Karenyi N (eds). 2019. *South African National Biodiversity Assessment 2018 Technical Report*  
715 *Volume 4: Marine Realm.* South African National Biodiversity Institute, Pretoria. South Africa.  
716 2019. Available from: <http://hdl.handle.net/20.500.12143/6372>

717

718 60. Marenzeller von E. Steinkorallen. *Wissenschaftliche Ergebnisse der Deutschen Tiefsee-*  
719 *Expedition auf dem Dampfer Valdivia.* 1904; 1898–1899 7(3): 261–318.

720

721 61. McQuaid KA, Bridges AEH, Howell KL, Gandra TBR, de Souza V, Currie JC, Hogg  
722 OT, Pearman TRR, Bell JB, Atkinson LJ, Baum D, Bonetti J, Carranza A, Defeo O, Furey T,  
723 Gasalla MA., Golding N, Hampton SL, Horta S, Jones DOB, Lombard AT, Manca E, Marin Y,  
724 Martin S, Mortensen P, Passadore C, Piechaud N, Sink KJ, Yool A. Broad-scale benthic habitat

725 classification of the South Atlantic. *Progress in oceanography*. 2023; 103016.

726 <https://doi.org/10.1016/j.pocean.2023.103016>

727

728 62. Milne-Edwards, H, Haime J. Recherches sur les Polypiers, deuxième mémoire:

729 Monographie des Turbinolides. *Ann Sci Nat Zool*. 1848a; 3(9): 211–344.

730

731 63. Naumann MS, Orejas C, Ferrier-Pagès C. Species-specific physiological response by the

732 cold-water corals *Lophelia pertusa* and *Madrepora oculata* to variations within their natural

733 temperature range. *Deep Sea Res Part II: Top Stud Oceanogr*. 2014; 99, pp.36-41.

734

735 64. Oakham V. Deep-Sea Coral Reefs: Distribution, Ecology and Anthropogenic Impacts.

736 2009.

737

738 65. O'Hara TD, Rowden AA, Bax NJ. A southern hemisphere bathyal fauna is distributed in

739 latitudinal bands. *Current Biology*. 2011; 21(3):226-30.

740

741 66. Olbers JM. Taxonomy, biodiversity and biogeography of the brittle stars (Echinodermata:

742 Ophiuroidea) of South Africa. PhD. Thesis. University of Cape Town. 2016. Available from:

743 <http://hdl.handle.net/11427/22906>

744

745 67. Orejas C, Wienberg C, Titschack J, Tamborrino L, Freiwald A, Hebbeln D. *Madrepora*  
746 *oculata* forms large frameworks in hypoxic waters off Angola (SE Atlantic). Scientific Reports.  
747 2021;11(1):15170.

748

749 68. Owens J. *Letepsammia franki*, a new species of deep-sea coral  
750 (Coelenterata: Scleractinia: Micrabaciidae). Proc Biol Soc. 1994; 107(4): 586–590.

751

752 69. Reygondeau G. Current and future biogeography of exploited marine exploited groups  
753 under climate change. In Predicting Future Oceans: Sustainability of Ocean and Human Systems  
754 Amidst Global Environmental Change. Elsevier Inc. 2019. [https://doi.org/10.1016/B978-0-12-](https://doi.org/10.1016/B978-0-12-817945-1.00009-5)  
755 [817945-1.00009-5](https://doi.org/10.1016/B978-0-12-817945-1.00009-5)

756

757 70. Reygondeau G, Dunn D. Pelagic biogeography. Encyclopedia of Ocean Sciences. 2018 ;  
758 588–598. <https://doi.org/10.1016/B978-0-12-409548-9.11633-1>

759

760 71. Roberts J, Wheeler A, Freiwald A, Cairns S. Cold-water corals: the biology and geology  
761 of deep-sea coral habitats. Cambridge University Press. 2009.

762

763 72. Richter DJ, Watteaux R, Vannier T, Leconte J, Frémont P, Reygondeau G, Maillet N,  
764 Henry N, Benoit G, Da Silva O, Delmont TO. Genomic evidence for global ocean plankton  
765 biogeography shaped by large-scale current systems. Elife. 2022;11:e78129.

766



- 767 73. Sayre R, Wright D, Breyer S, Butler K, Van Graafeiland K, Costello M, Harris PT,  
768 Goodin K, Guinotte J, Basher Z, Kavanaugh M, Halpin P, Monaco M, Cressie N, Aniello P, Frye  
769 C, Stephens D. A three-dimensional mapping of the ocean based on environmental data.  
770 *Oceanography*. 2017; 30(1), 90–103. <https://doi.org/10.5670/oceanog.2017.116>  
771
- 772 74. Schouten M, de Ruijter W, Van Leeuwen P, Lutjeharms J. Translation, decay and  
773 splitting of Agulhas rings in the southeastern Atlantic Ocean. *J Geophys Res*. 2000; 105(C9),  
774 21913-21925p. <https://doi.org/10.1029/1999JC000046>  
775
- 776 75. Shannon LV. The Benguela ecosystem. I: Evolution of the Benguela physical features  
777 and processes. *Oceanogr Mar Biol*. 1985; 23, pp.105-182.  
778
- 779 76. Sheppard CRC, Sheppard ALS. Corals and coral communities of Saudi Arabia. *Fauna of*  
780 *Saudi Arabia*. 12: 1-170. 1991.  
781
- 782 77. Sink K, van der Bank M, Majiedt P, Harris L, Atkinson L, Kirkman S, Karenyi N (eds).  
783 In: *South African National Biodiversity Assessment 2018 Technical Report Volume 4: Marine*  
784 *Realm*. South African National Biodiversity Institute, Pretoria. South Africa. 2019. Available  
785 from: <http://hdl.handle.net/20.500.12143/6372>  
786
- 787 78. Sink KJ, Adams LA, Franken M-L, Harris LR, Currie J, Karenyi N, Dayaram A, Porter  
788 S, Kirkman S, Pfaff M, van Niekerk L, Atkinson LJ, Bernard A, Bessinger M, Cawthra H, de

789 Wet W, Dunga L, Filander Z, Green A, Herbert D, Holness S, Lamberth S, Livingstone T, Lück-  
790 Vogel M, Mackay F, Makwela M, Palmer R, Van Zyl W, Skowno A. Iterative mapping of  
791 marine ecosystems for spatial status assessment, prioritization, and decision support. *Front. Ecol.*  
792 *Evol.* 2023; 11:1108118. doi: 10.3389/fevo.2023.1108118

793

794 79. Spalding M, Fox H, Allen G, Davidson N, Ferdaña Z, Finlayson M, Halpern BS, Jorge  
795 M, Lombana A, Lourie S, Martin, K, Mcmanus E, Molnar J, Recchia C, Robertson J. Marine  
796 Ecoregions of the World: A Bioregionalization of Coastal and Shelf Areas. *BioScience*. 2007;  
797 57(7), 573–583. <https://doi.org/10.1641/B570707>.

798

799 80. Spengler L. Beskrivelse over et ganske besynderligt Corall-product, hvilket man, indtil  
800 dets Sloegt noermere bestemmes, kunde kalde en Snekke-Madrepore (*Madrepora cochlea*). *Nye*  
801 *Saml. Danske Videnskebernes Selskab Skrifter* 1: 240–248. 1781.

802

803 81. Summers N, Watling L. Upper Bathyal Pacific Ocean biogeographic provinces from  
804 octocoral distributions. *Progr Oceanogr.* . 2021; 191, 102509.  
805 <https://doi.org/10.1016/j.pocean.2020.102509>

806

807 82. Thandar S. Zoogeography of the southern African echinoderm fauna. *S Afric J Zool.*  
808 1989; 24(4), 311–318. <https://doi.org/10.1111/j.1365-2699.2004.01144.x>

809

810 83. United Nations. Revised Roadmap for the UN Decade of Ocean Science for Sustainable  
811 Development. 2018. Available online at: <http://www.fao.org/3/CA0463EN/ca0463en.pdf>

812

813 84. United Nations. Revised draft text of an agreement under the United Nations Convention  
814 on the Law of the Sea on the conservation and sustainable use of marine biological diversity of  
815 areas beyond national jurisdiction, Intergovernmental conference on an international legally  
816 binding instrument under the United Nations Convention on the Law of the Sea on the  
817 conservation and sustainable use of marine biological diversity of areas beyond national  
818 jurisdiction (fourth session, New York, 23 March–3 April 2020). UNGA: New York. 2019.

819

820 85. United Nations Environment Program Convention on Biological Diversity. Zero draft of  
821 the post-2020 global biodiversity framework. 2020. Available online at:

822 <https://www.cbd.int/doc/c/efb0/1f84/a892b98d2982a829962b6371/wg2020-02-03-en.pdf>

823

824 86. Vaughan T. A critical review of the literature on the simple genera of the Madreporaria  
825 Fungida, with a tentative classification. Proc U S Natl Mus. 1905; 28(1401): 371–424.

826 <https://doi.org/10.5479/si.00963801.1401.371>

827

828 87. Verrill A. Classification of polyps (extract condensed from Synopsis of the Polyps and  
829 Corals of the North Pacific Exploring Expedition under Commodore C. Ringgold and Captain  
830 John Rodgers, U.S.N.). Communications of the Essex Institute 4: 145–152. 1865. Available  
831 from: <https://www.biodiversitylibrary.org/page/34752272>.

832

833 88. Waters J. Driven by the West Wind Drift? A synthesis of southern temperate marine  
834 biogeography, with new directions for dispersalism. *J Biogeogr.* 2008; 35(3), 417–427.  
835 <https://doi.org/10.1111/j.1365-2699.2007.01724.x>

836

837 89. Watling L, Guinotte J, Clark MR, Smith CR. A proposed biogeography of the deep ocean  
838 floor. *Progress in Oceanography.* 2013;111:91-112.

839

840 90. Watling L, Lapointe A. Global biogeography of the lower bathyal (700–3000 m) as  
841 determined from the distributions of cnidarian anthozoans. *Deep Sea Res Part I: Oceanogr Res*  
842 *Pap.* 2022; p.103703. <https://doi.org/10.1016/j.dsr.2022.103703>

843

844 91. Woolley S, Foster S, Bax N, Currie J, Dunn D, Hansen C, Hill N, O’Hara T, Ovaskainen  
845 O, Sayre R, Vanhatalo J, Dunstan P. Bioregions in Marine Environments: Combining Biological  
846 and Environmental Data for Management and Scientific Understanding. *BioScience.* 2020;  
847 70(1), 48–59. <https://doi.org/10.1093/biosci/biz133>

848

849 92. WoRMS Editorial Board. World Register of Marine Species. Available from  
850 <https://www.marinespecies.org> at VLIZ. 2023. Accessed 2023-02-17. doi:10.14284/170

851

852 93. Zezina ON. Biogeography of the bathyal zone. In *Advances in Marine Biology* 1997  
853 (Vol. 32, pp. 389-426). Academic Press.

854

855

856 **Supporting information**

857 **Appendix A:** Excel

858

859 **Appendix B:** Draftsman's plot.

860 **Figure 2.** Draftsman's plot showing the interrelations between depth and the longitudinal groups identified at by the

861 k-R cluster mean analysis.

862

863 **Appendix C:** Excel

864

865 **Appendix D:** Histograms

866 **Figure 5.** Simulated distribution/histogram of the test statistic R under the null hypothesis that there are "no

867 differences" in coral patterns within each condition: **TOP.** krLong groups with observed data at R=0.05 and p=

868 0.001; **BOTTOM.** z-level (depth) with observed data at R = 0.072 and p = 0.001.

869

870 **Figure 6:** Simulated distribution/histogram of the test statistic R under the null hypothesis that there are "no

871 differences" in coral patterns within depth zones (R = 0.105, p = 0.001).

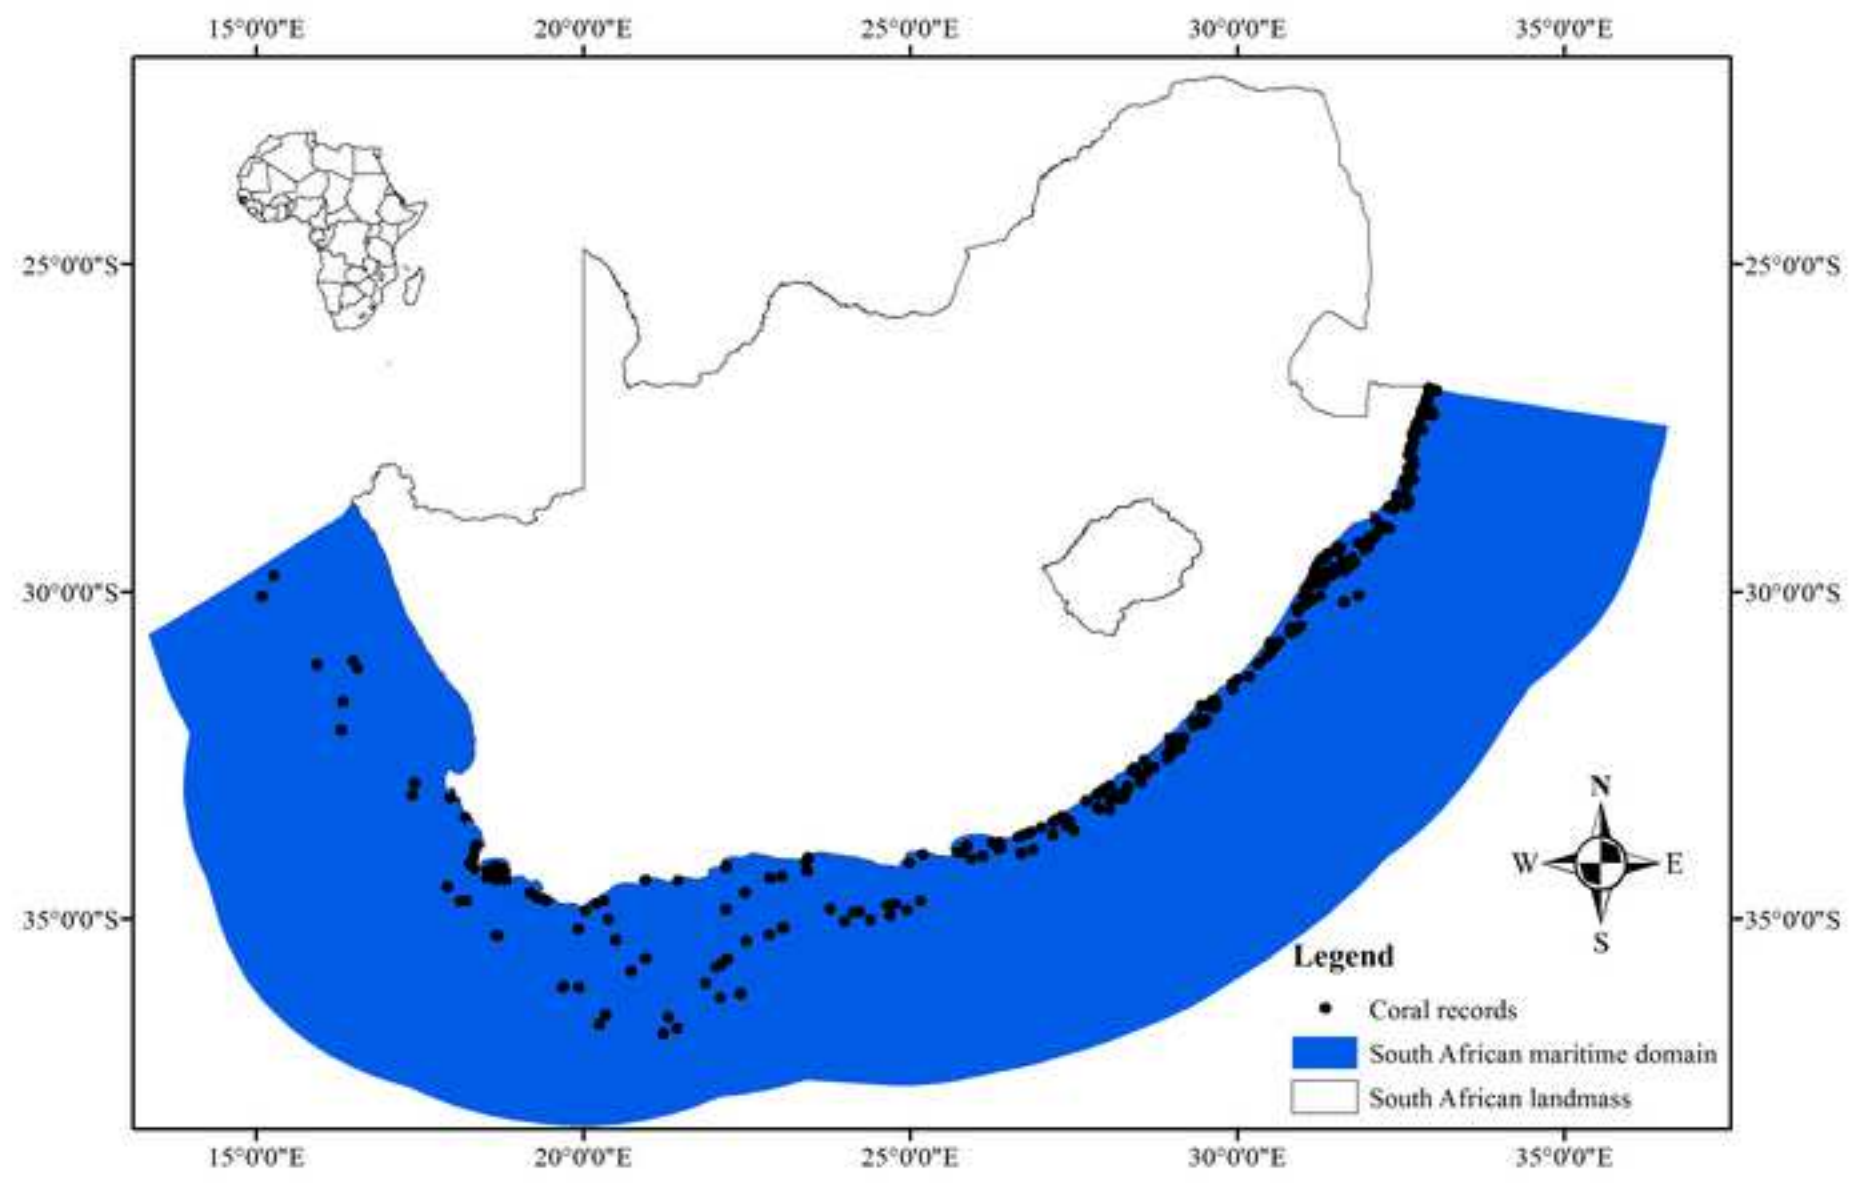

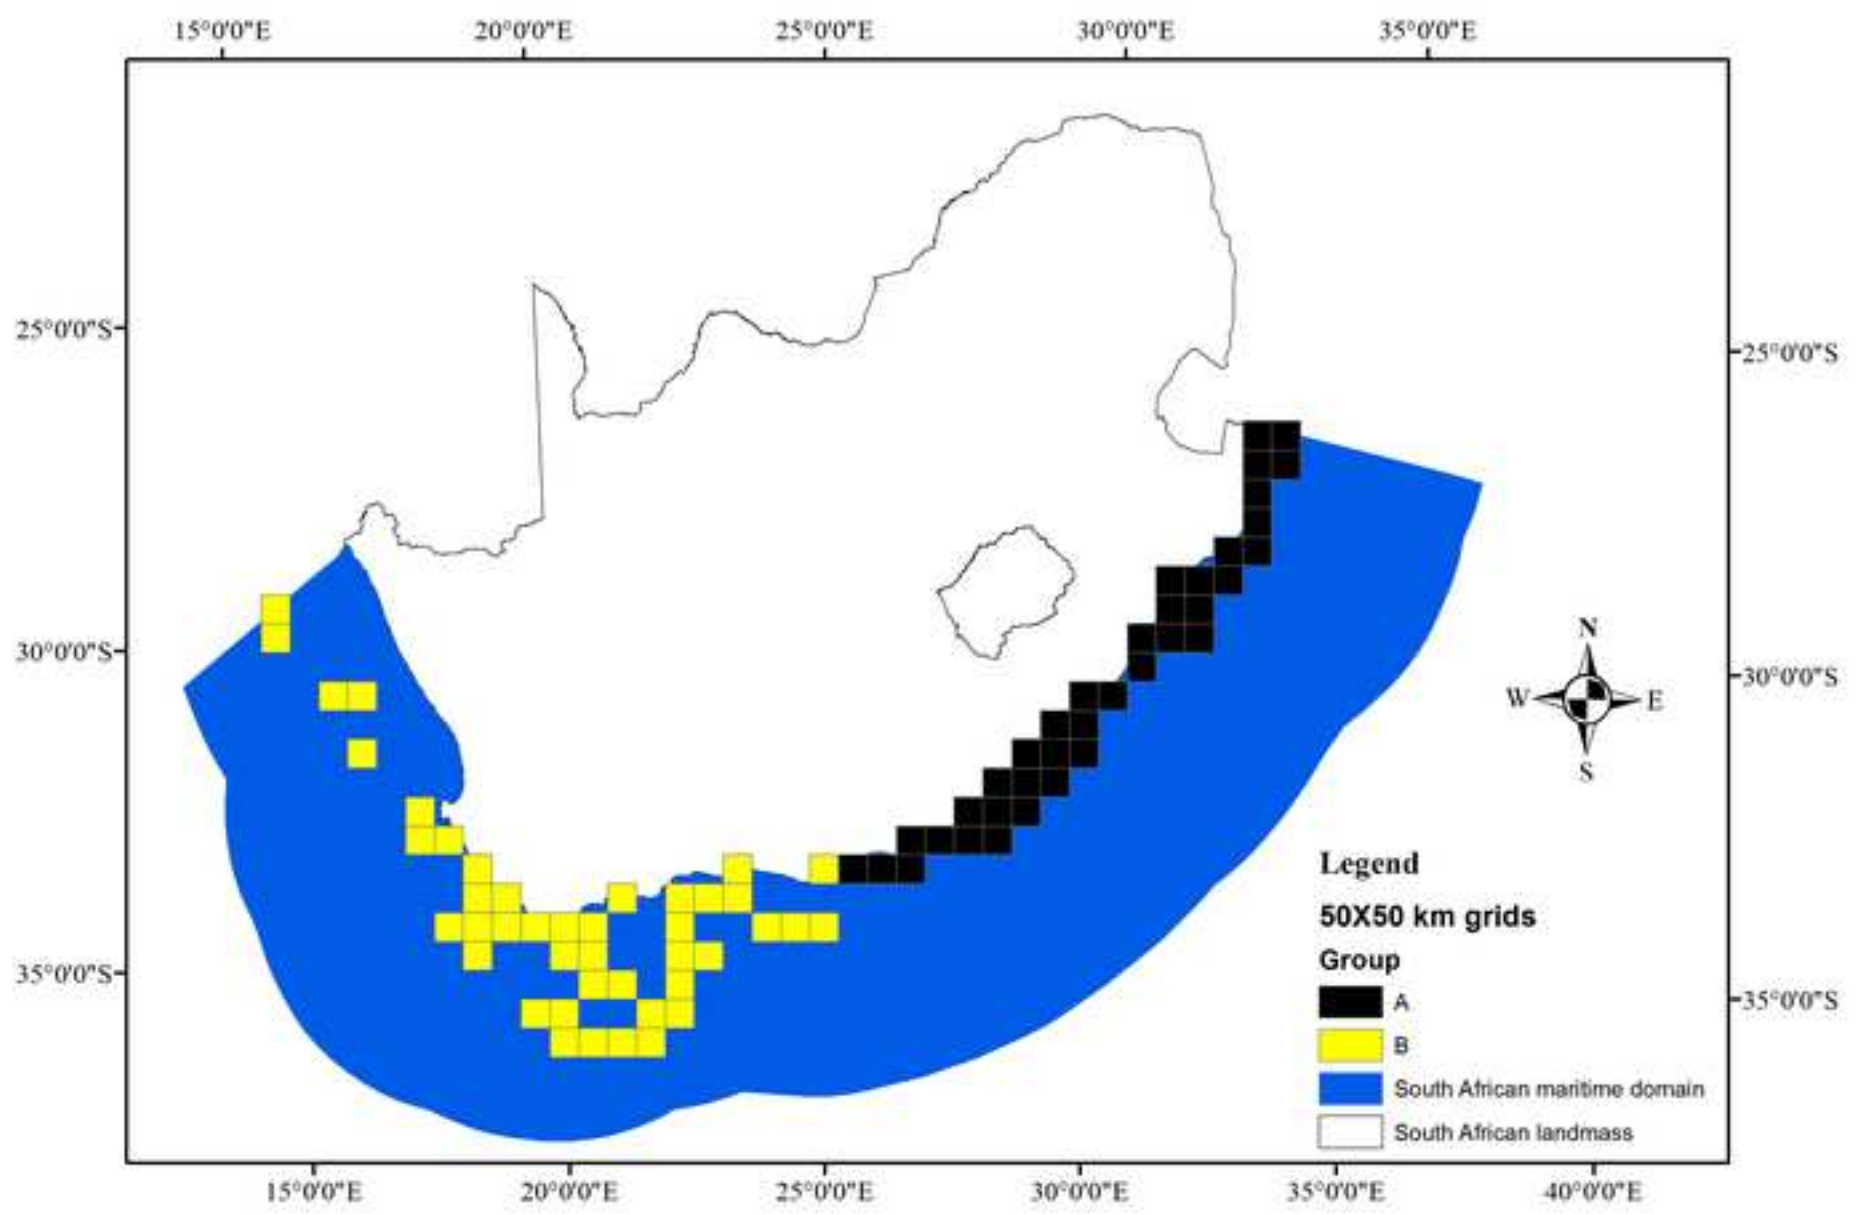

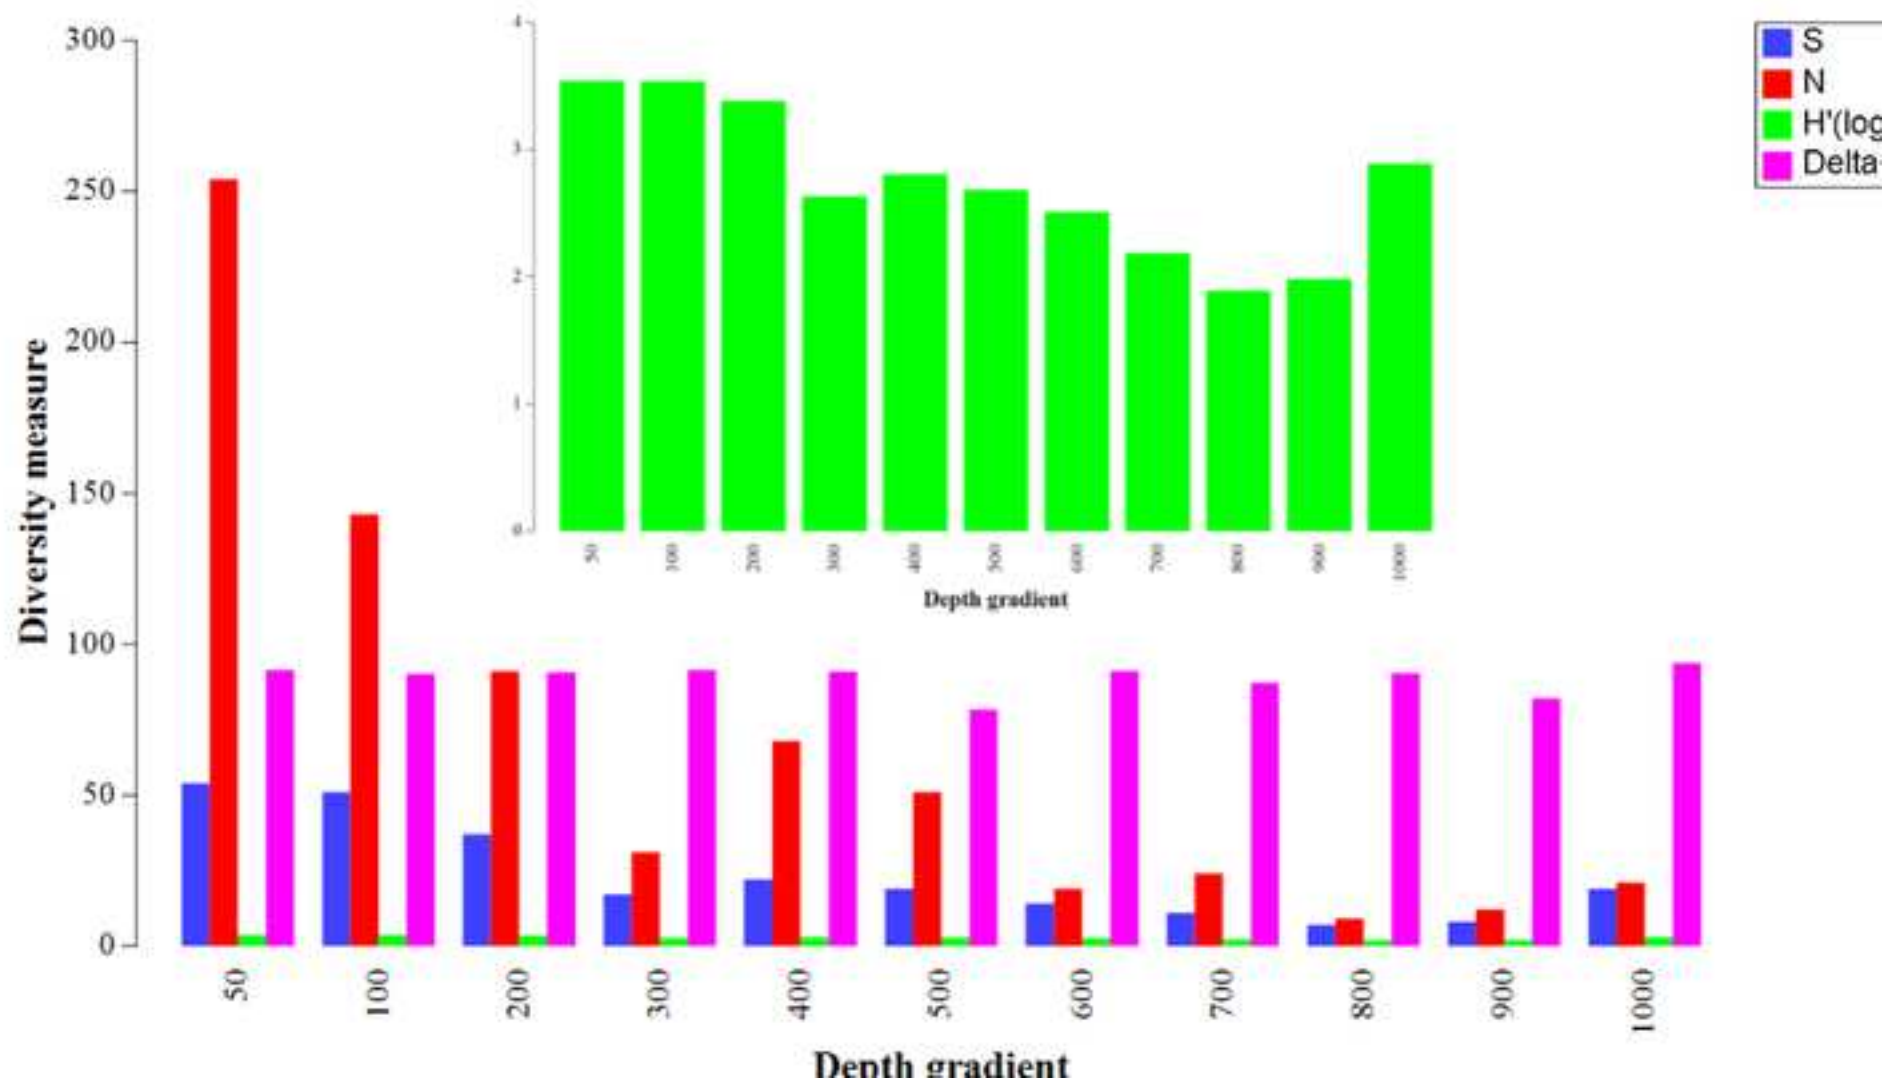





### RELATE

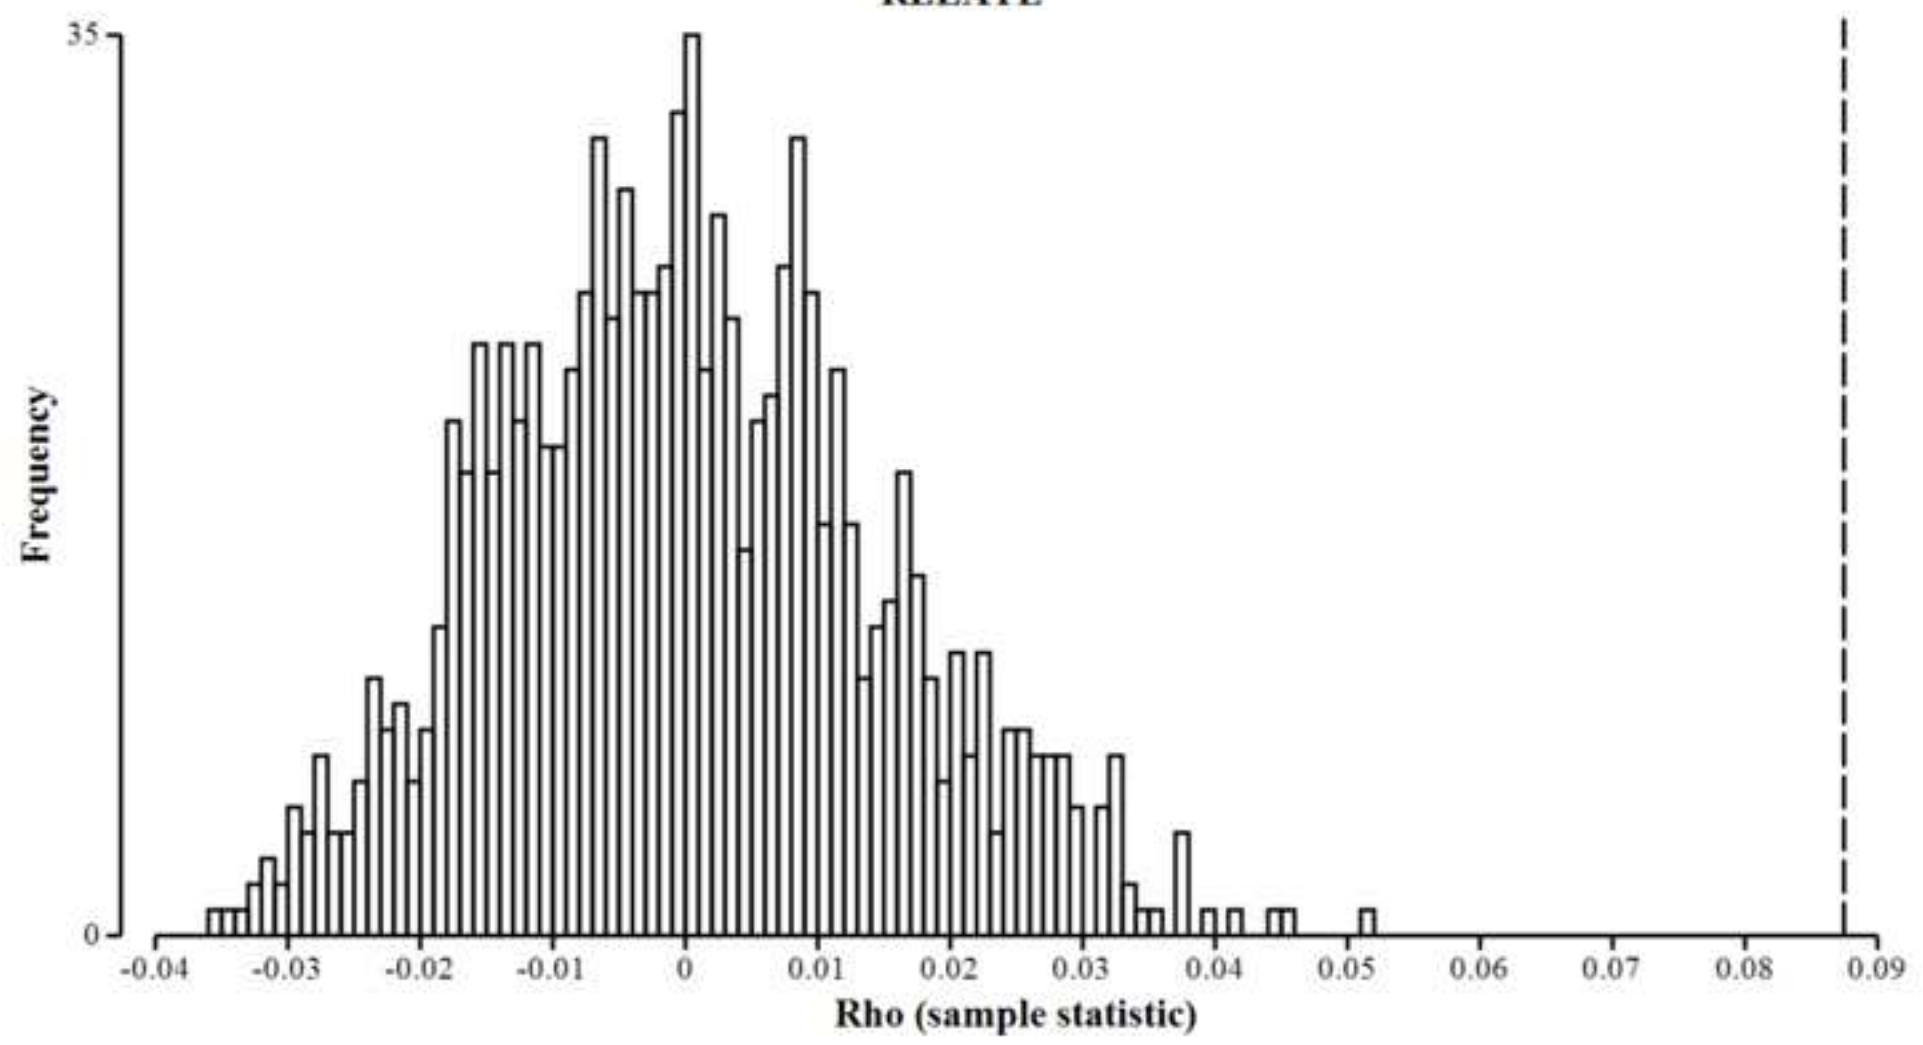

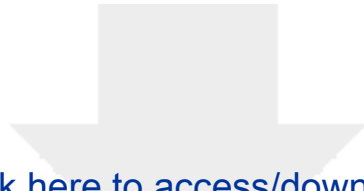

Click here to access/download  
**Supporting Information**  
Appendix D\_Figure 5. TOP.tif

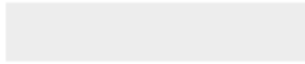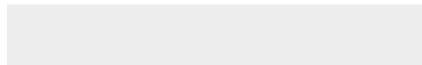



Click here to access/download  
**Supporting Information**  
Appendix D\_Figure 5. Bottom.tif

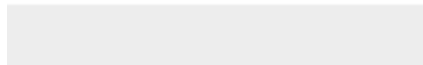

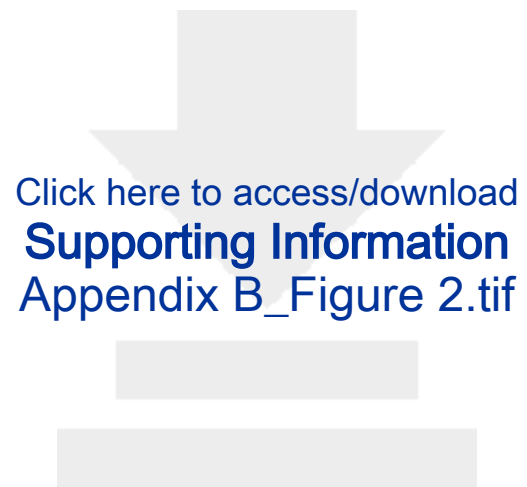



Click here to access/download  
**Supporting Information**  
Appendix D\_Figure 6.tif





[Click here to access/download](#)

**Supporting Information**

[Appendix A\\_biopaper\\_plos paper.xlsx](#)

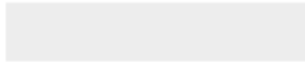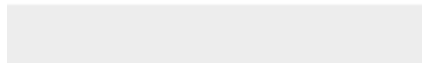



[Click here to access/download](#)

**Supporting Information**

Appendix C\_biopaper\_plos paper.xlsx

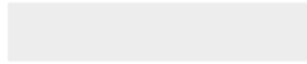

Supplement: pone.0296188.s002.pdf [file pone.0296188.s002.pdf]
